# Supplementary material for: A regioselective double Stille coupling reaction of bicyclic stannolanes
Source: Royal Society of Chemistry journal article supplement (doi:10.1039/c6ob01018k), 2016-01-01
Supplement: c6ob01018k1.pdf [file c6ob01018k1.pdf]

Electronic Supplementary Information (ESI) for

**Regioselective Double Stille Coupling Reaction of Bicyclic Stannolanes**

Akio Kamimura,\* Toshiyuki Tanaka, Masahiro So, Tomoyuki Itaya, Kantaro Matsuda  
and Takuji Kawamoto

*Department of Applied Molecular Bioscience, Graduate School of Medicine,  
Yamaguchi University, Ube 755-8611 Japan*

e-mail: [ak10@yamaguchi-u.ac.jp](mailto:ak10@yamaguchi-u.ac.jp)

Contents

|                                                                                                                      |     |
|----------------------------------------------------------------------------------------------------------------------|-----|
| <sup>1</sup> H and <sup>13</sup> C NMR charts for compounds <b>2</b> , <b>4</b> , <b>5</b> , <b>6</b> , and <b>7</b> | S2  |
| ORTEP chart for compound <b>6e</b>                                                                                   | S36 |

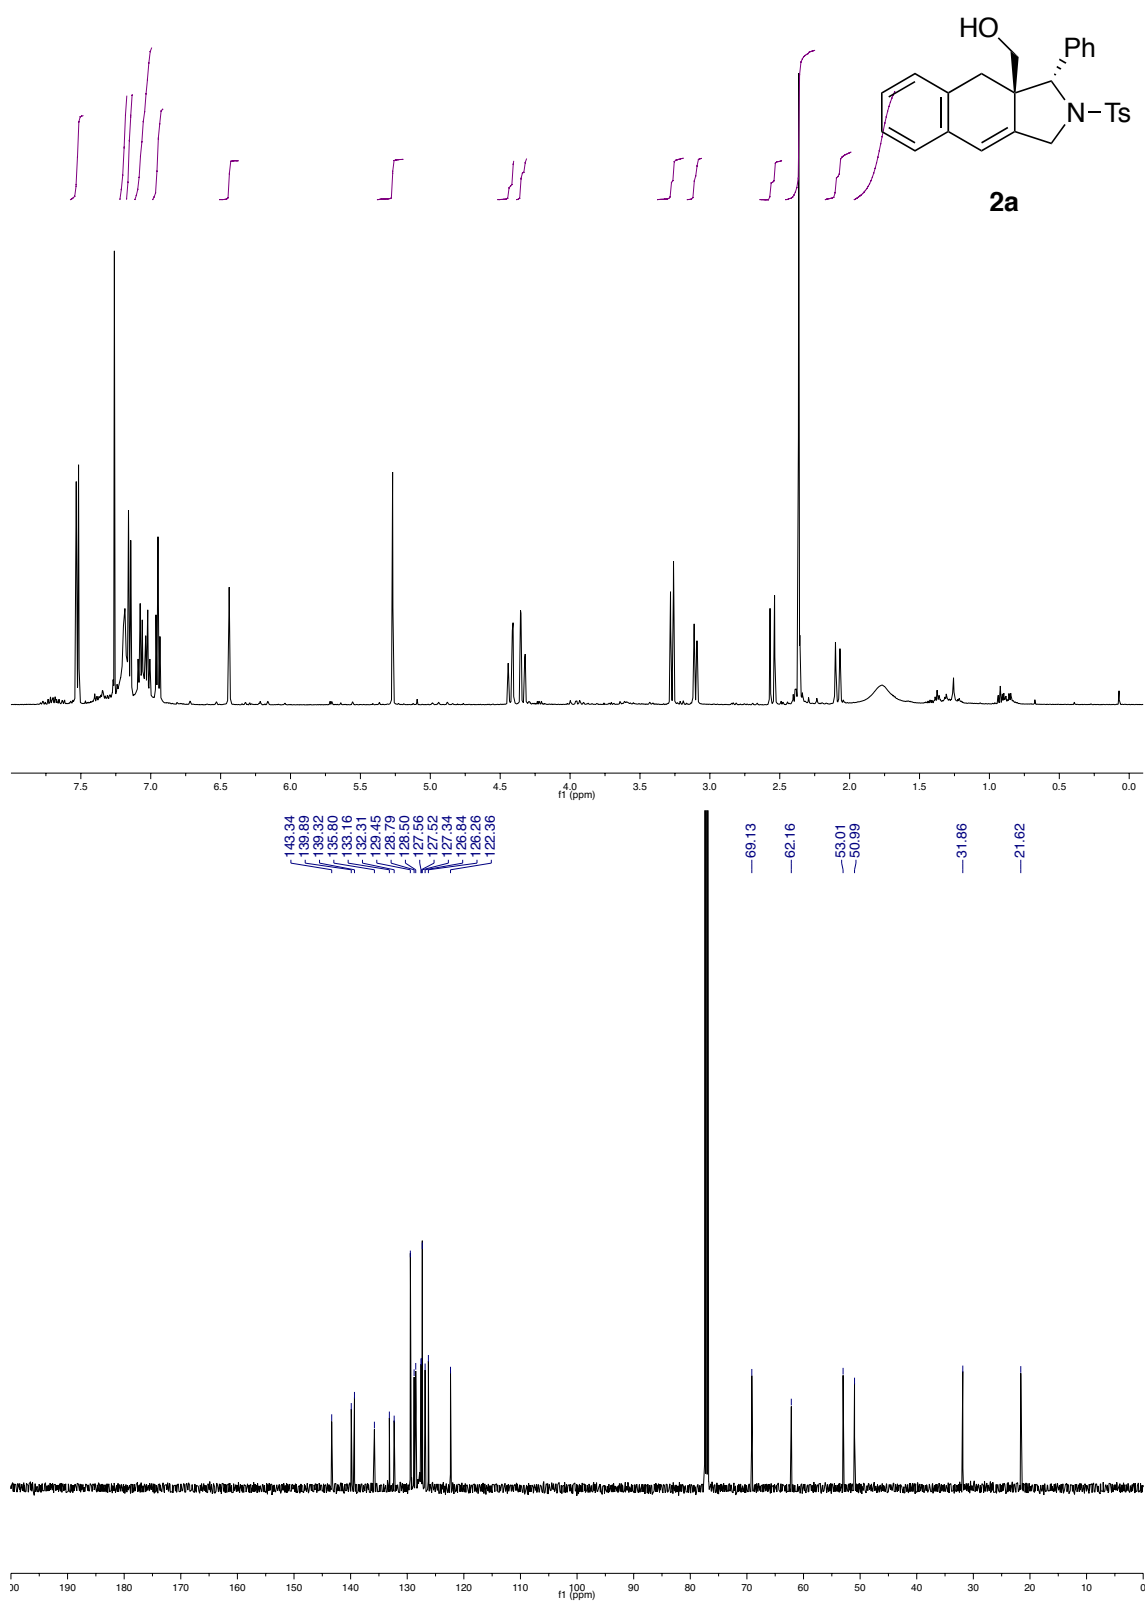

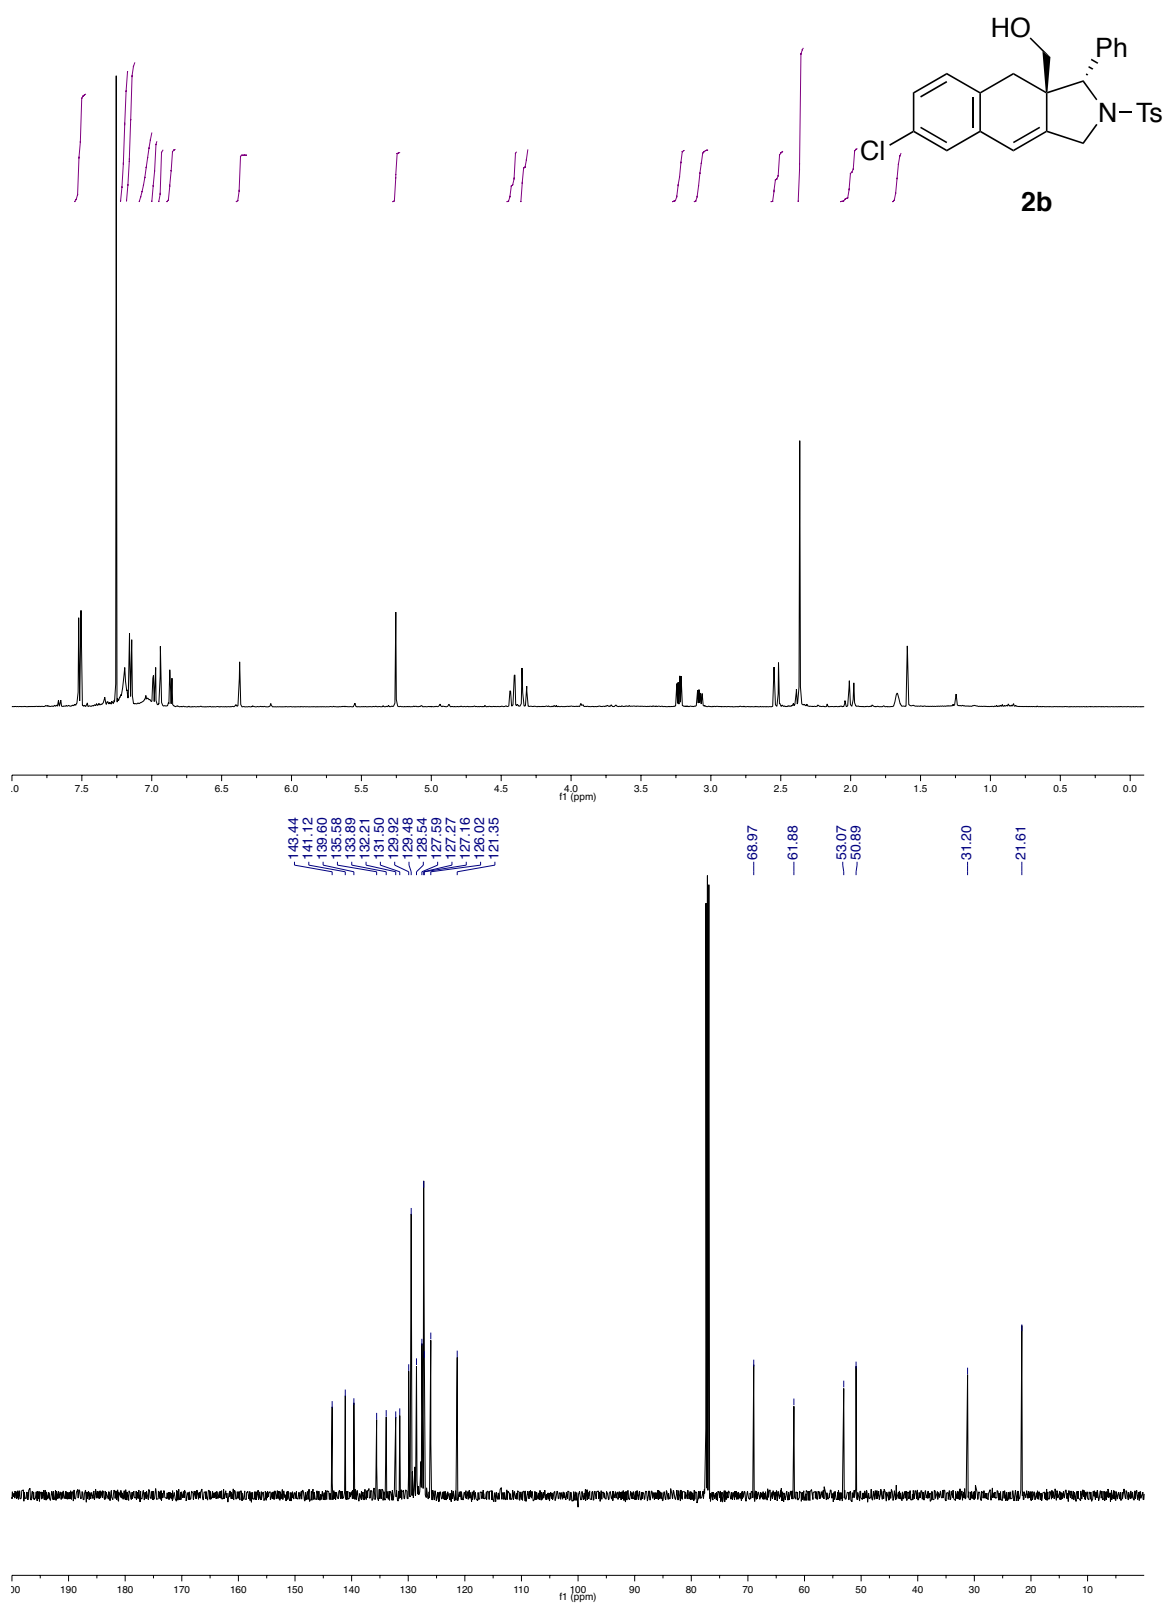

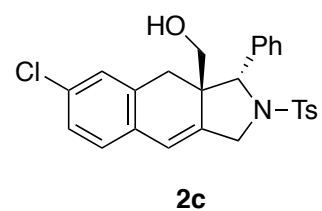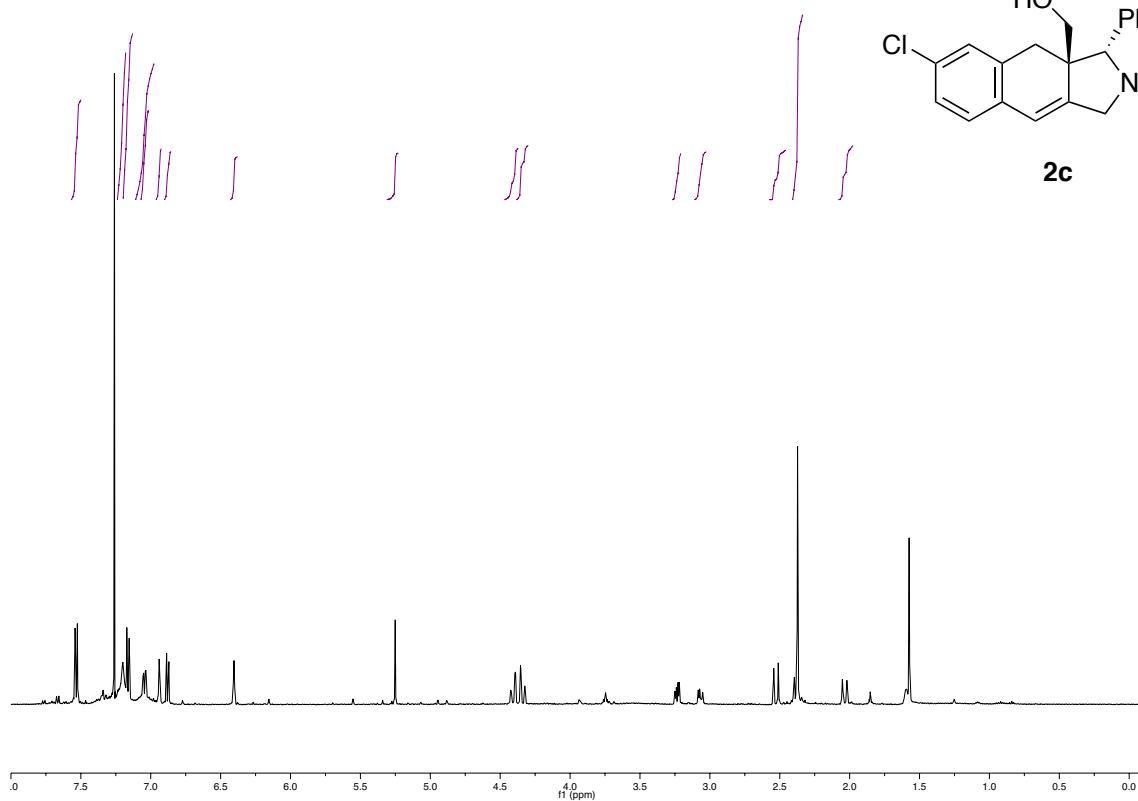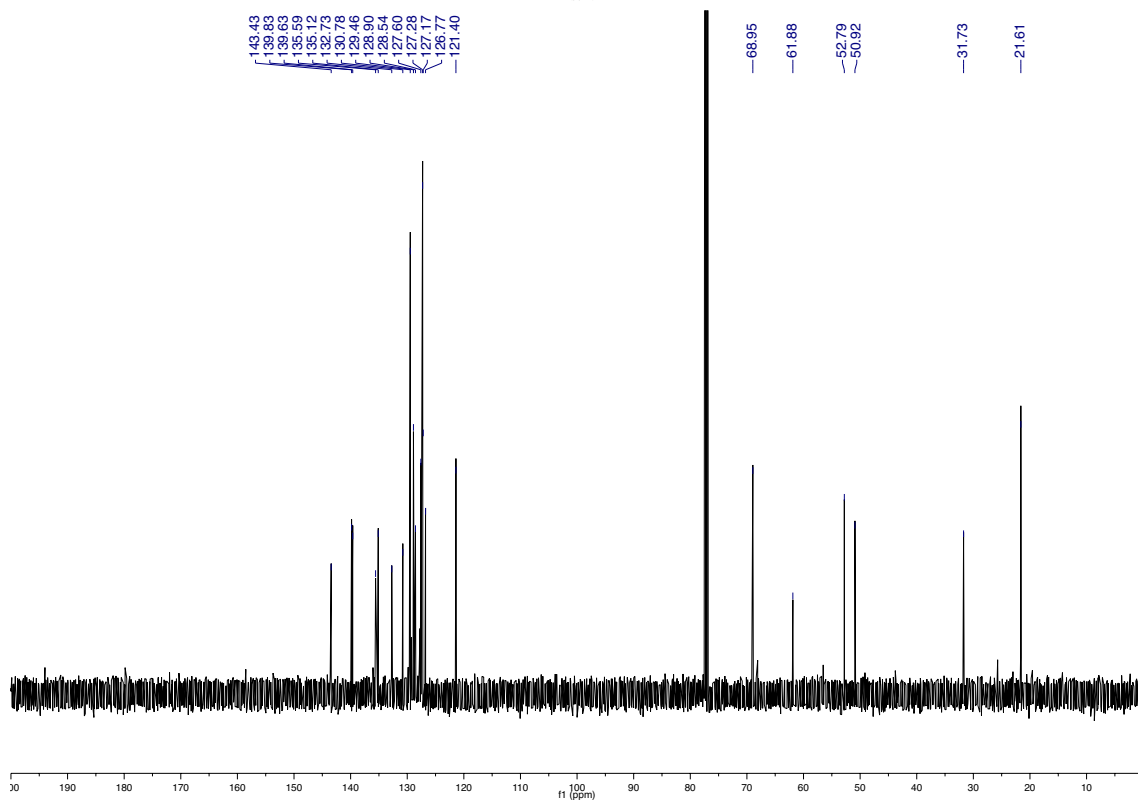

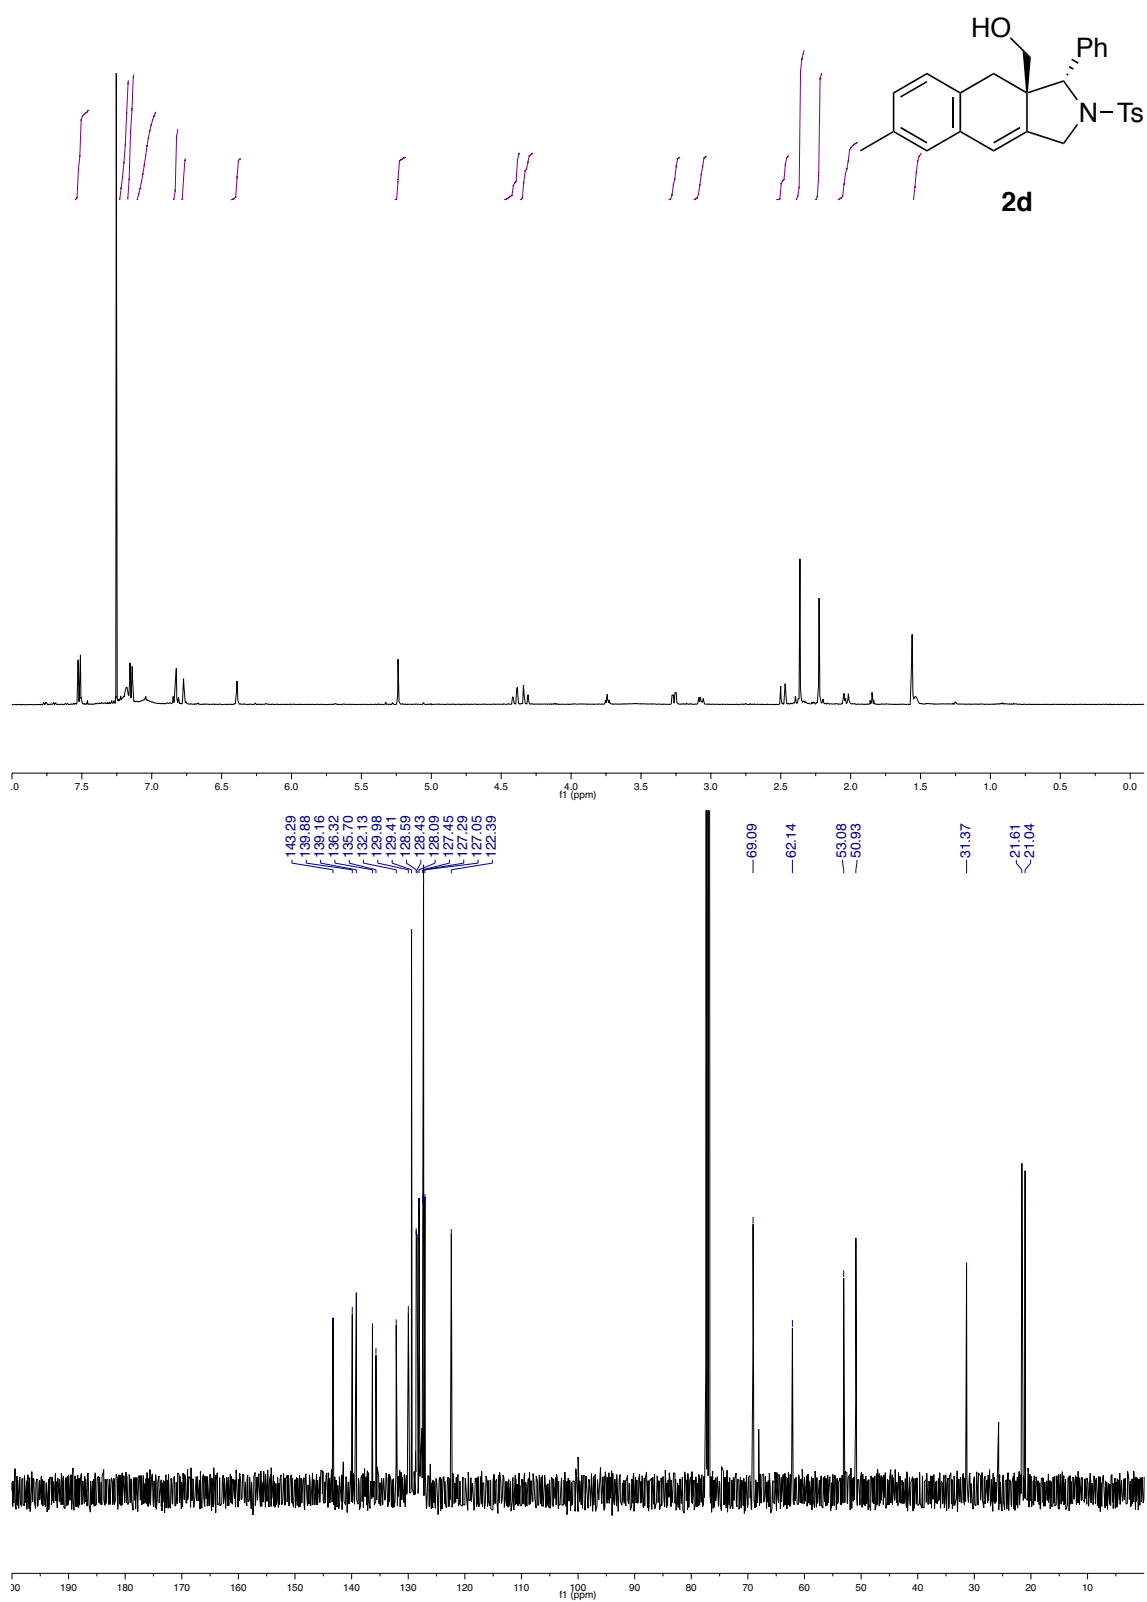

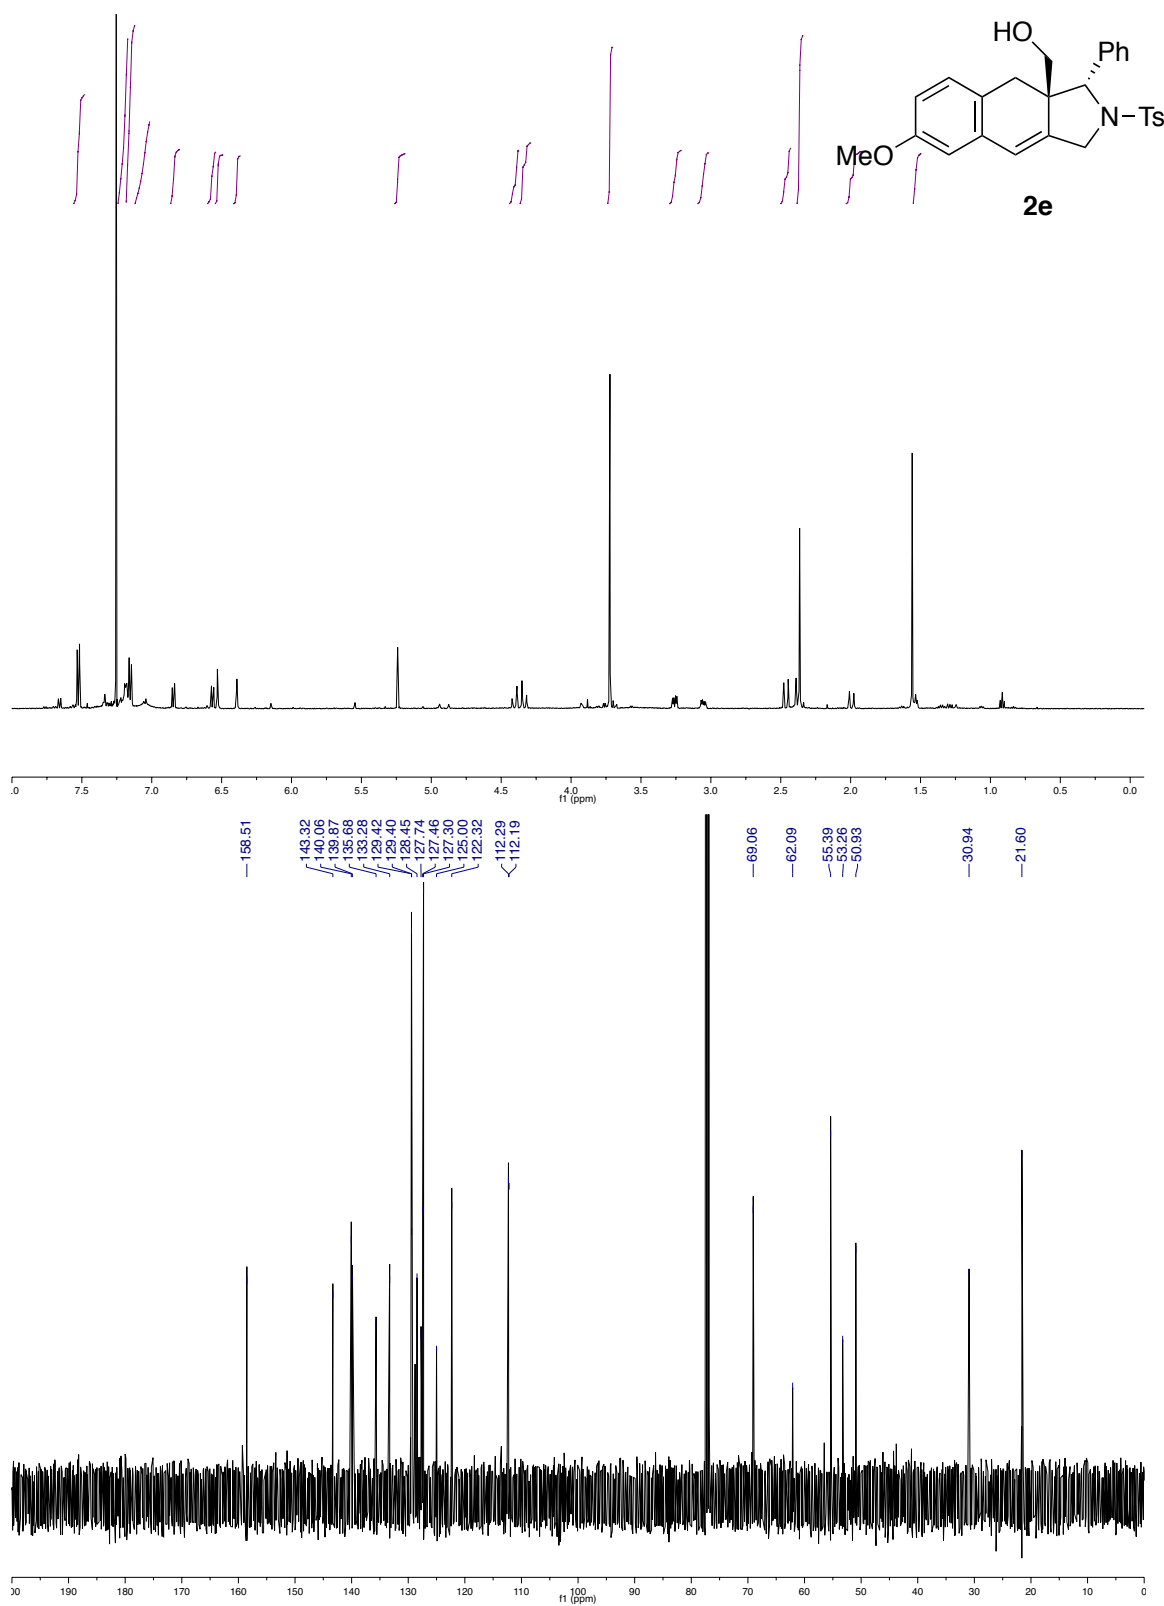

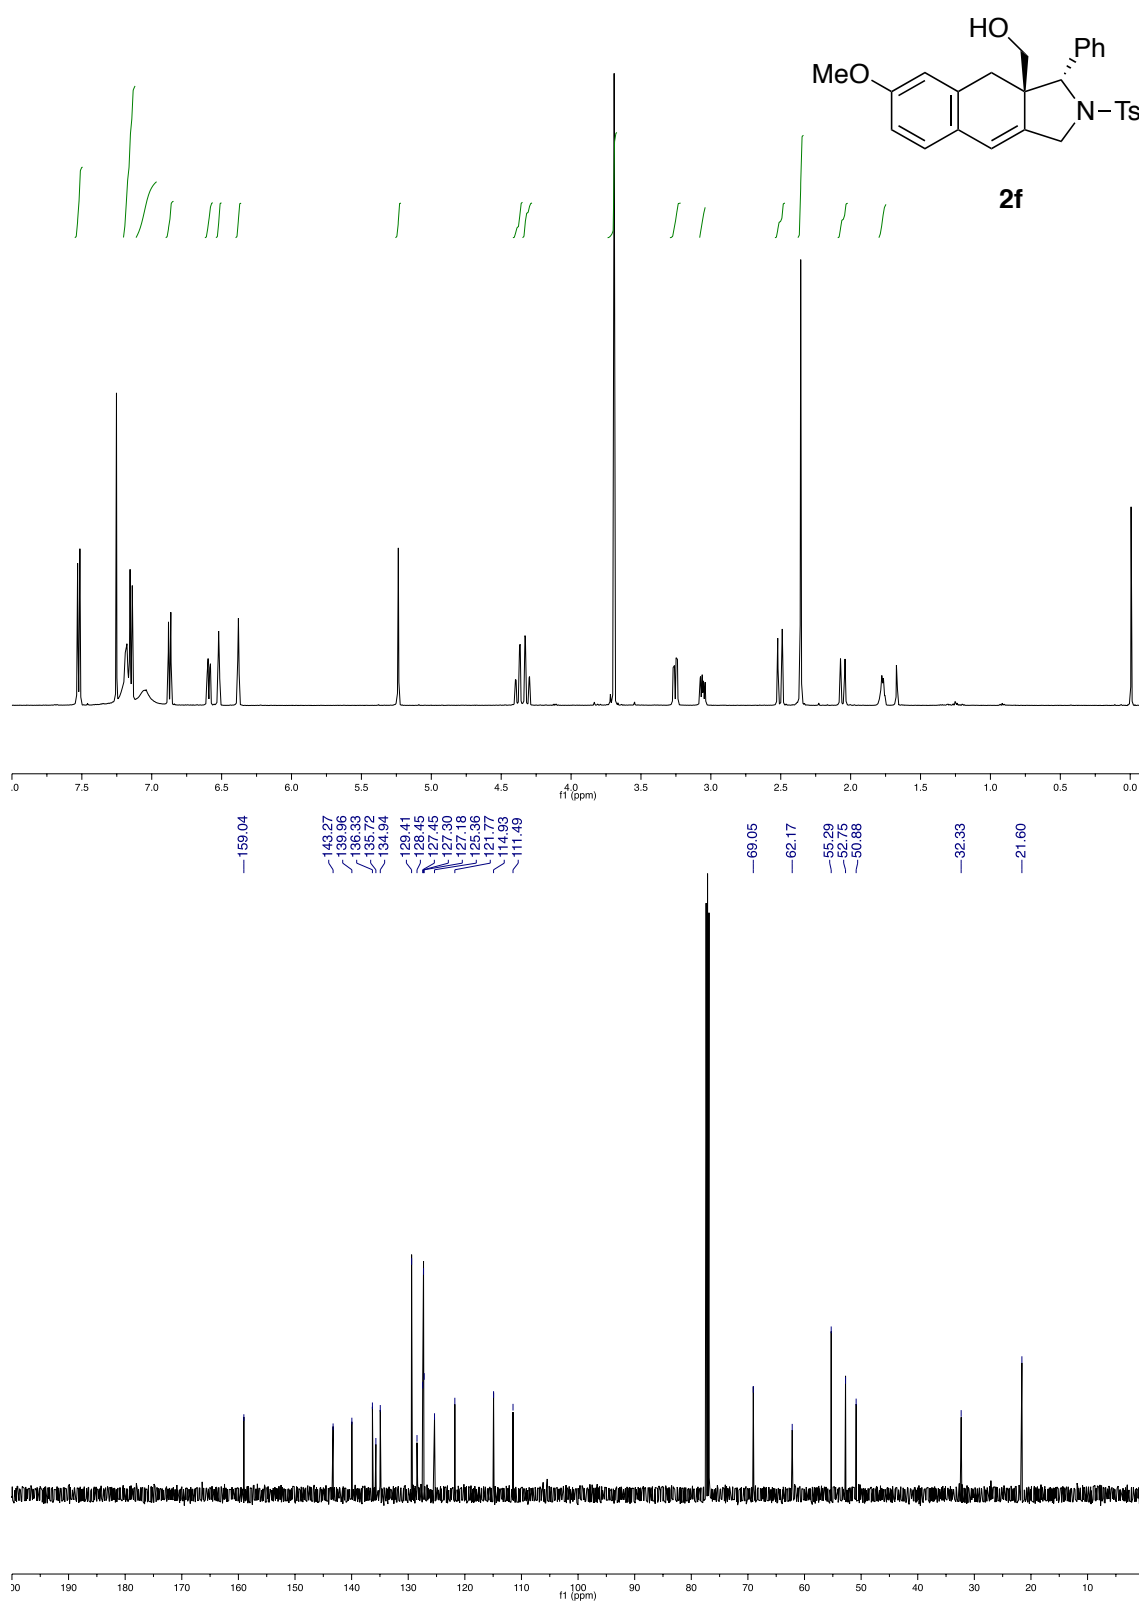

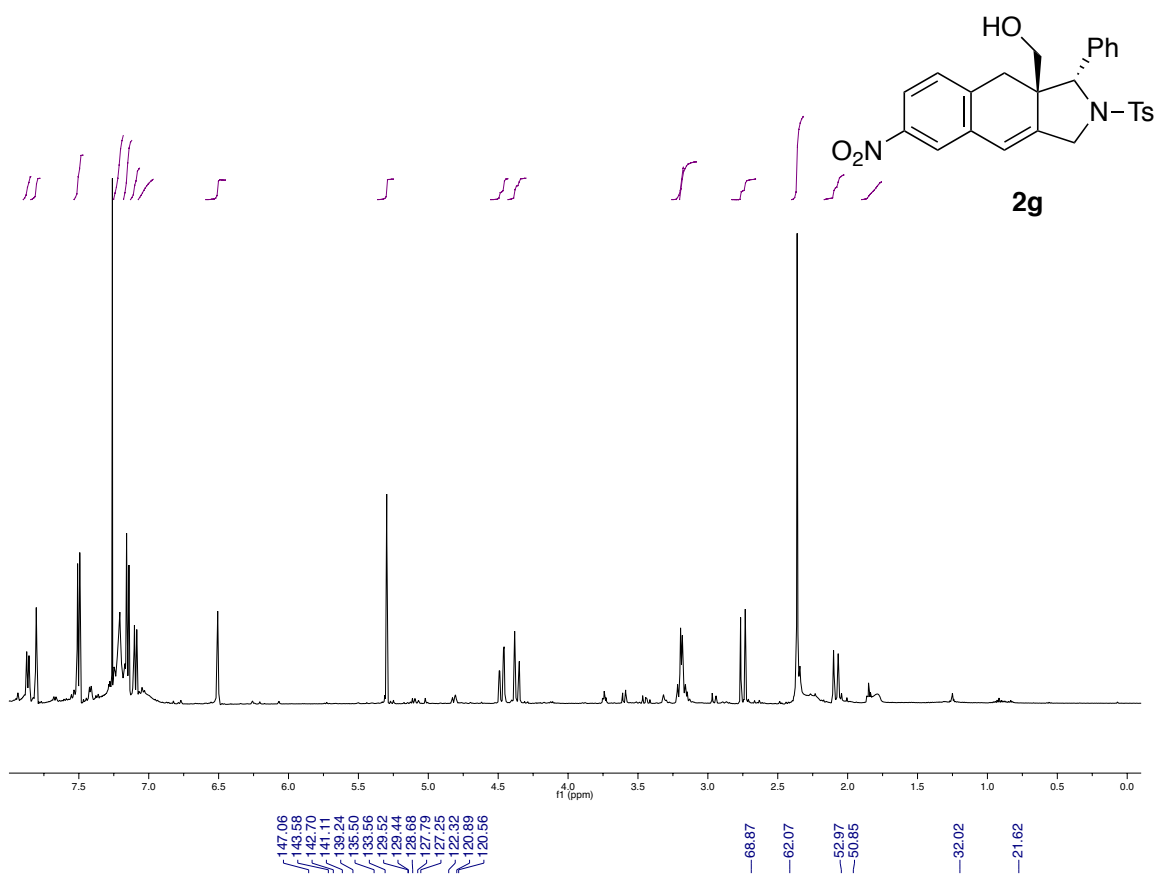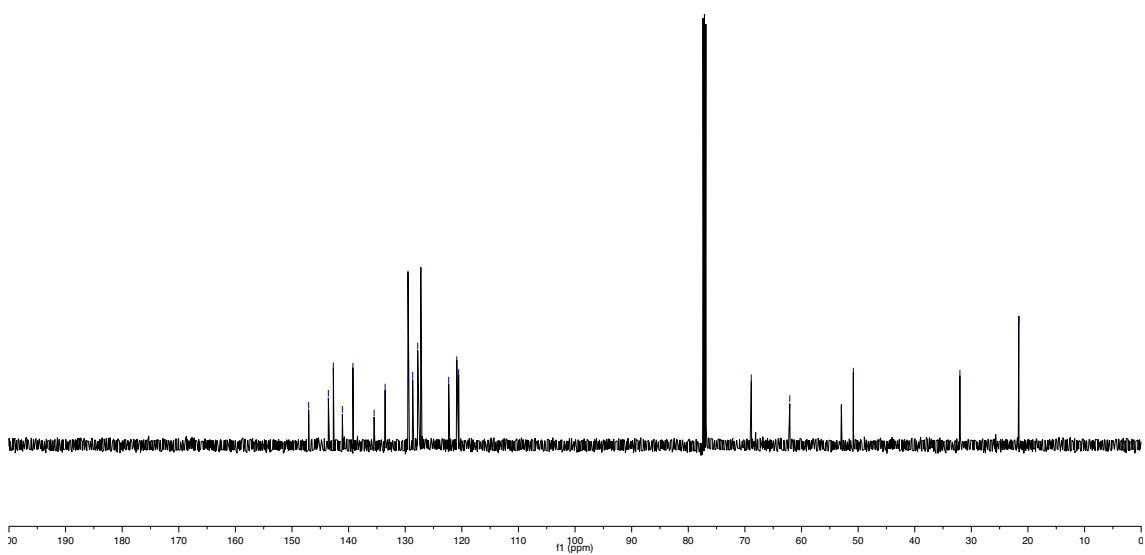



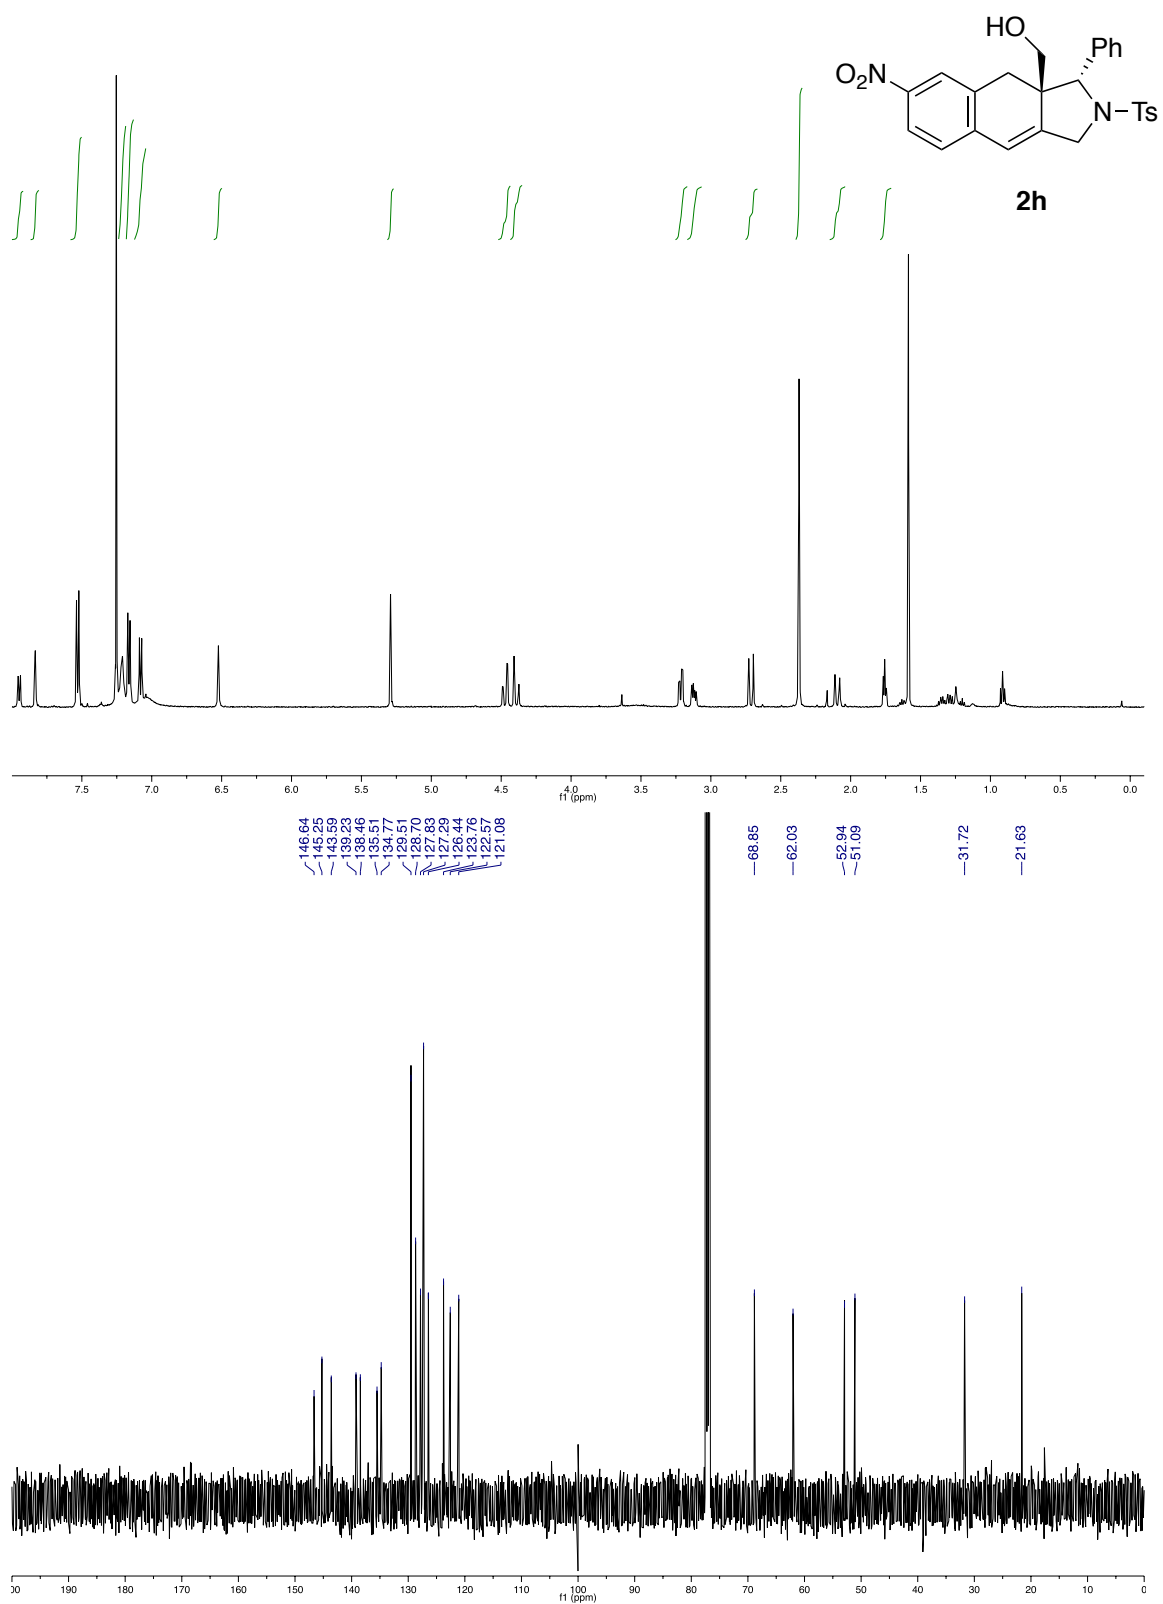

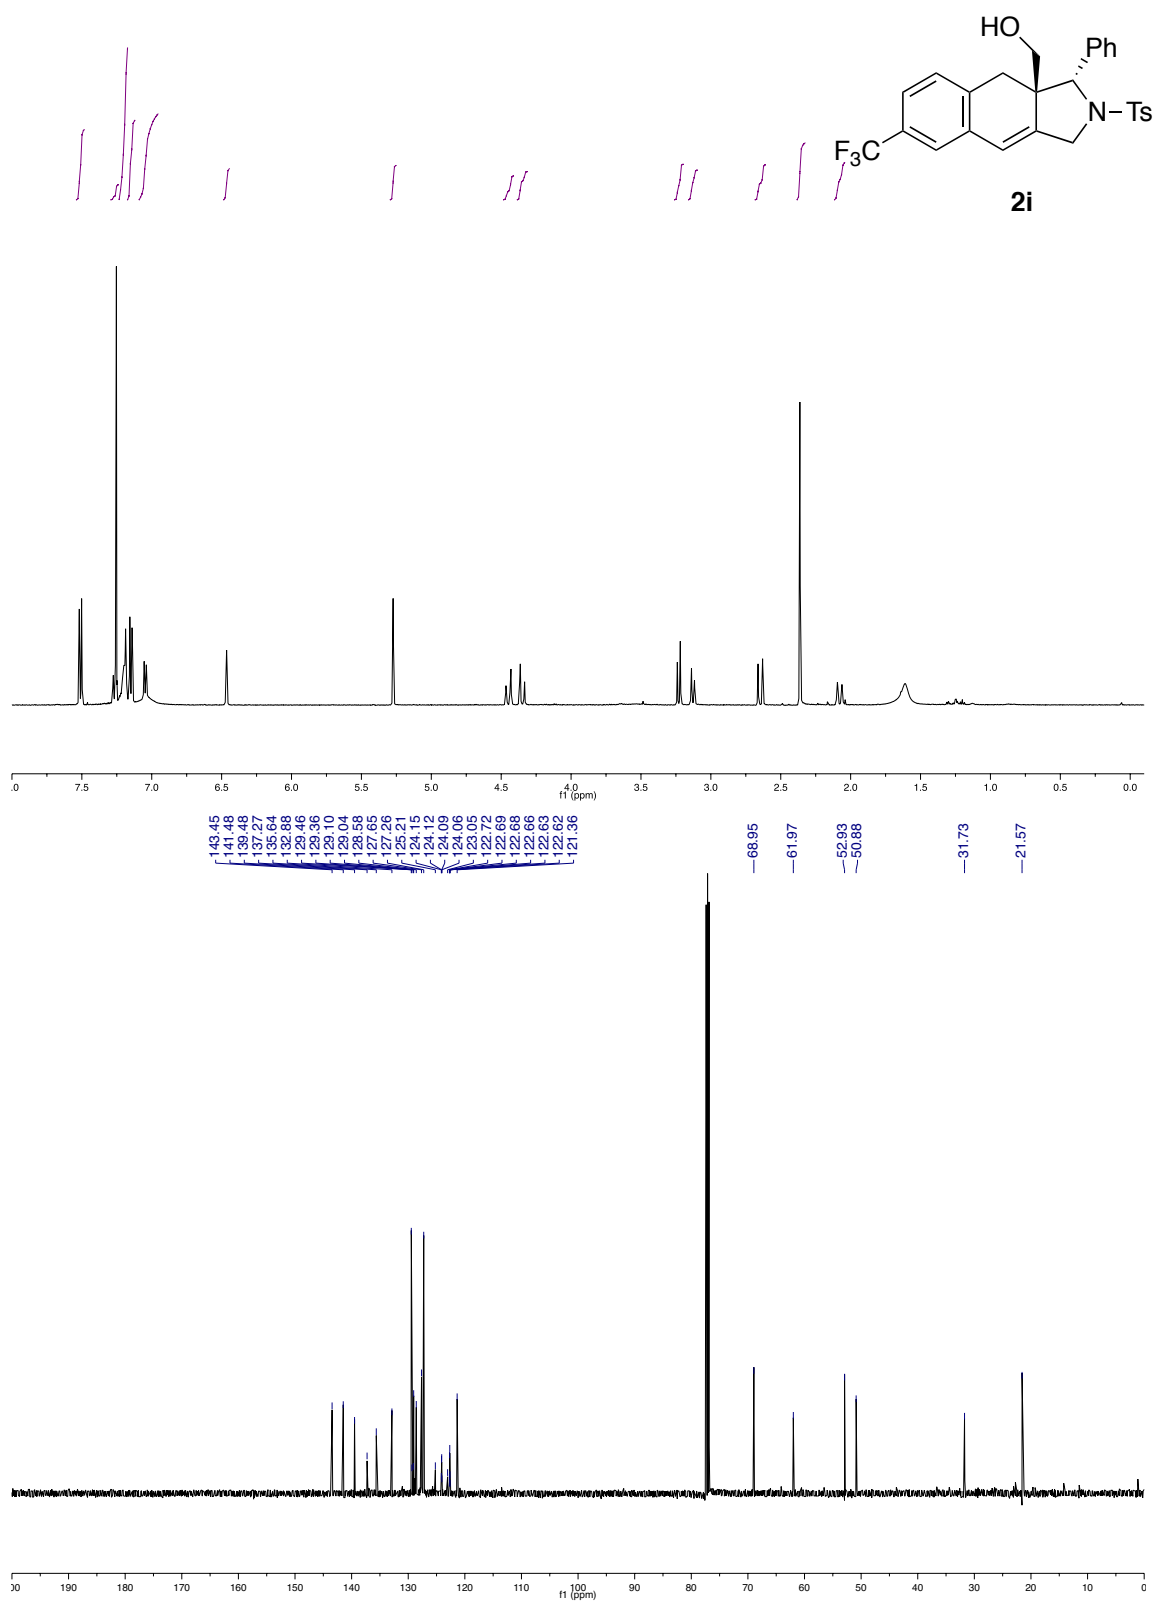

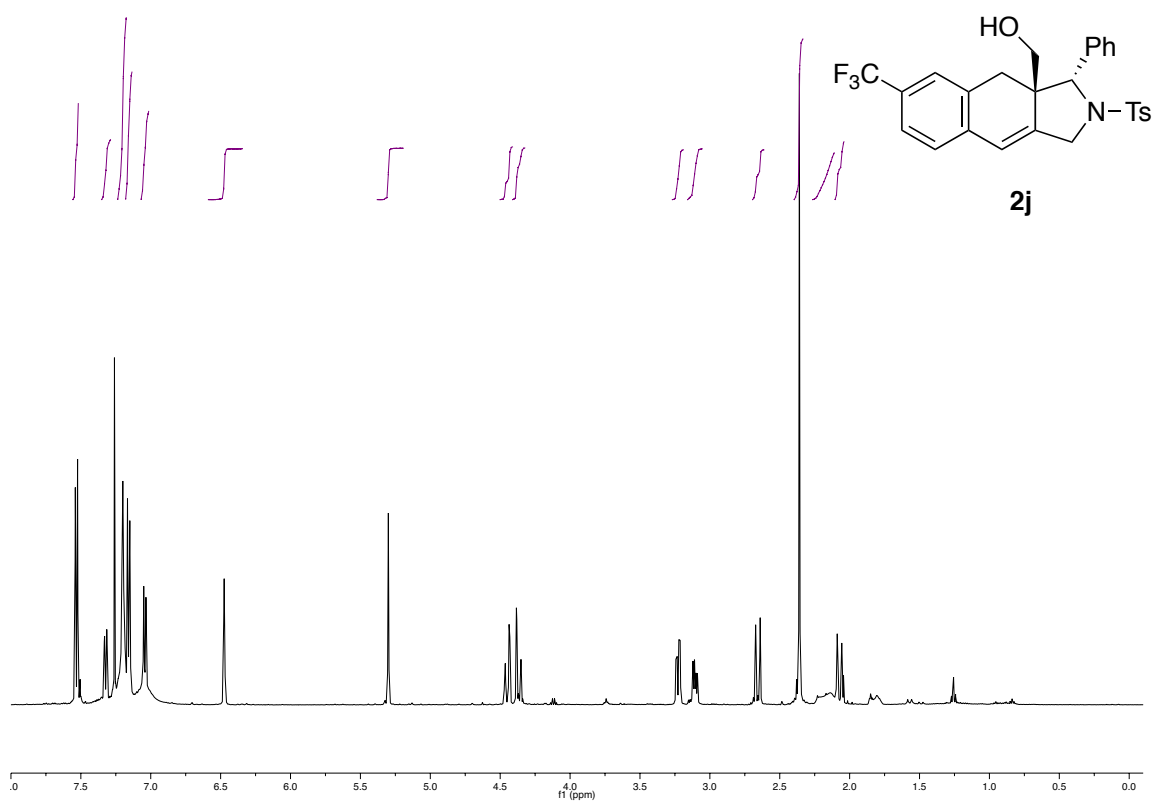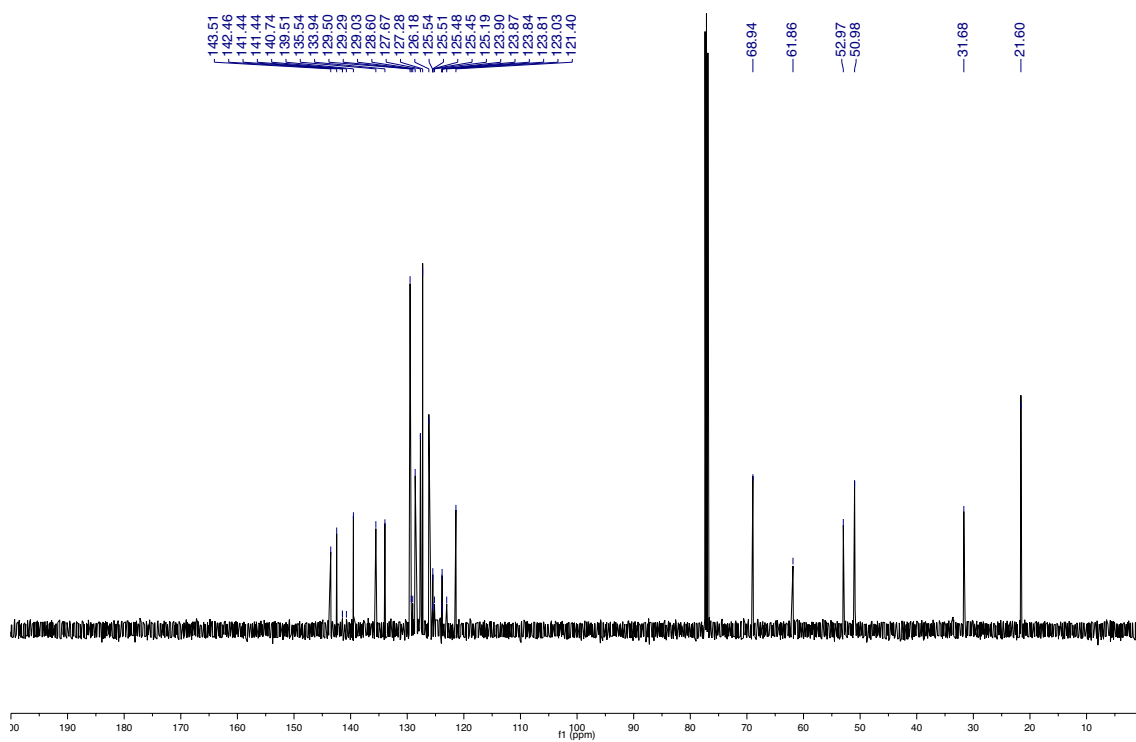

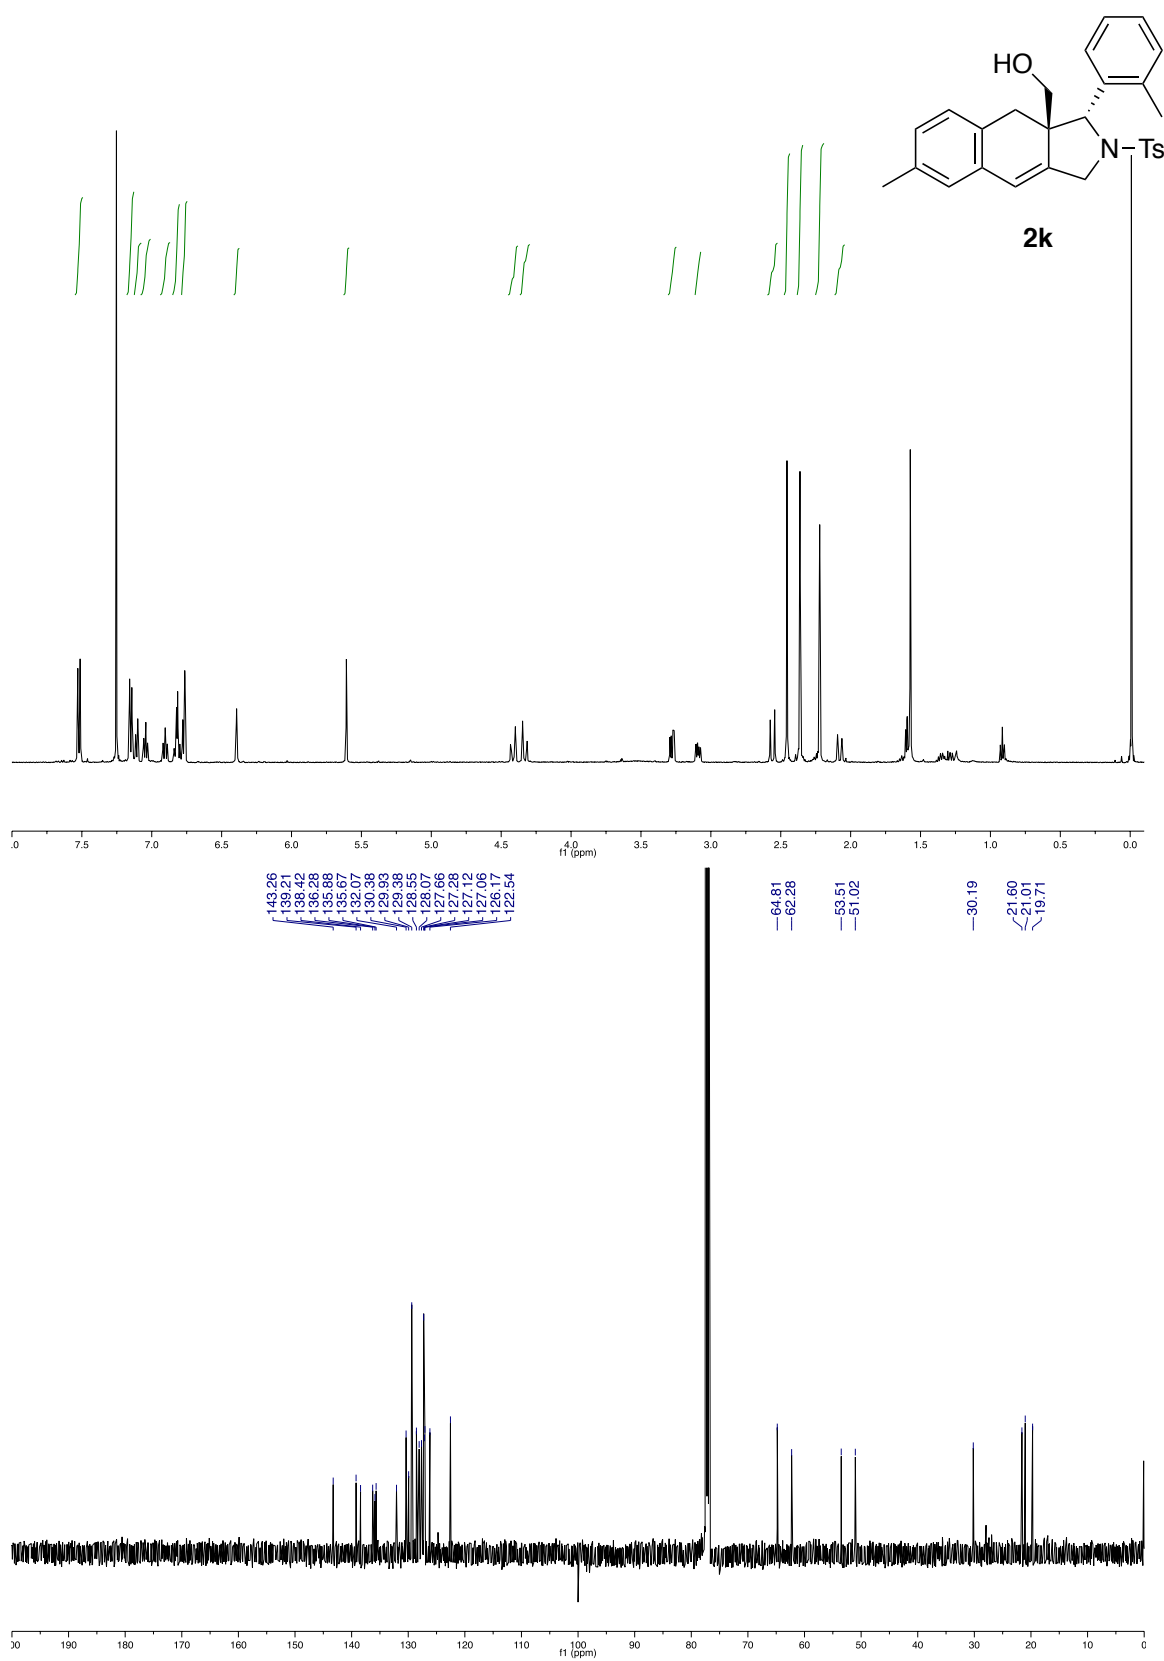

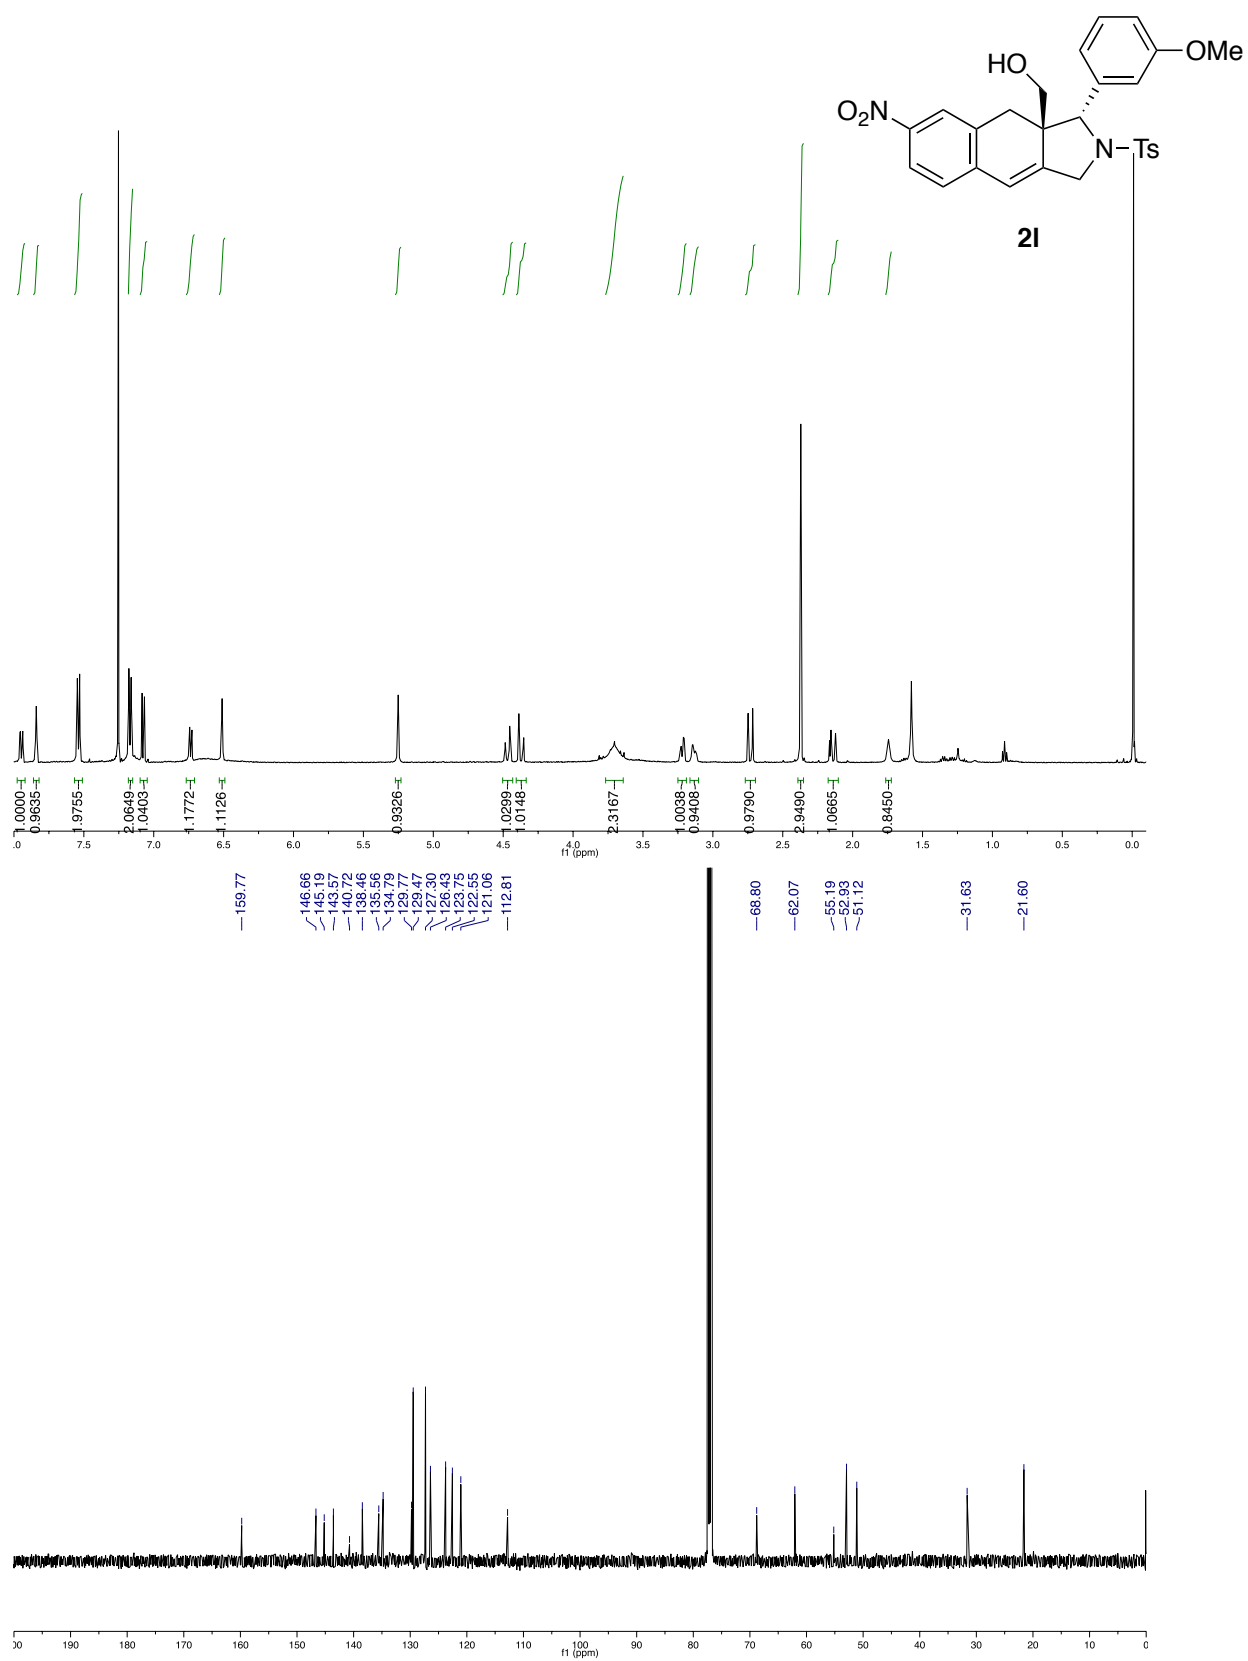

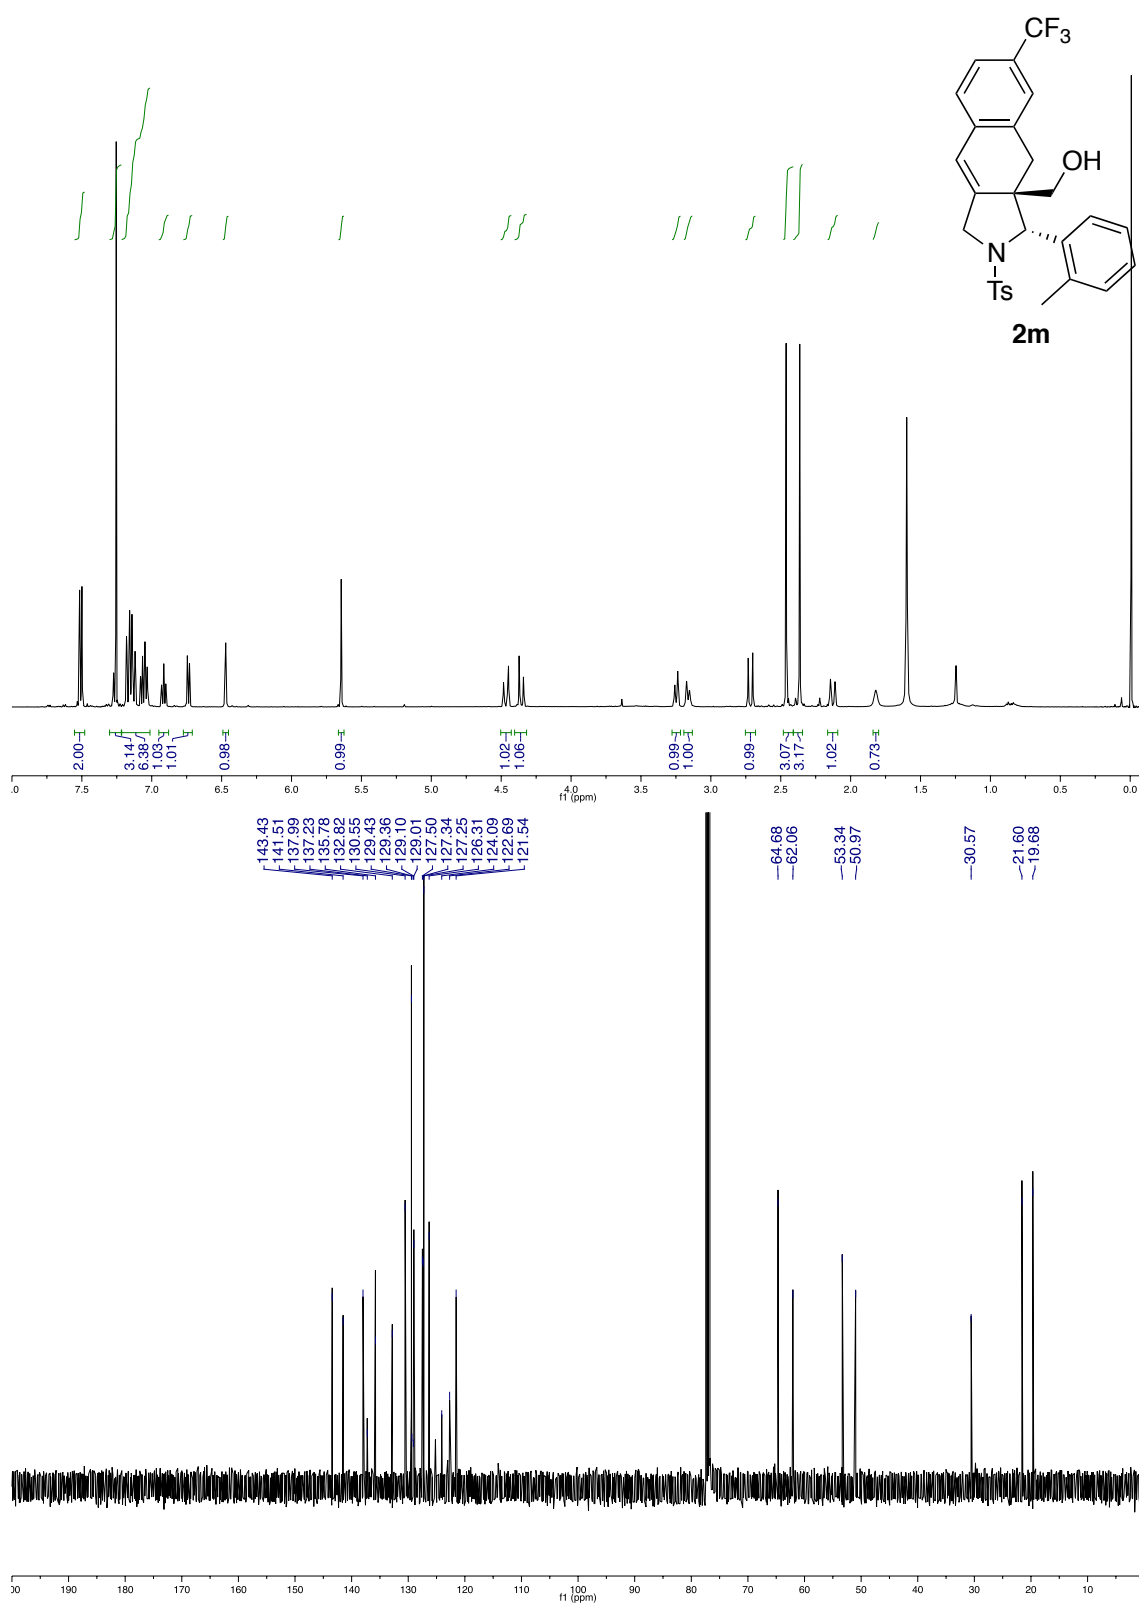

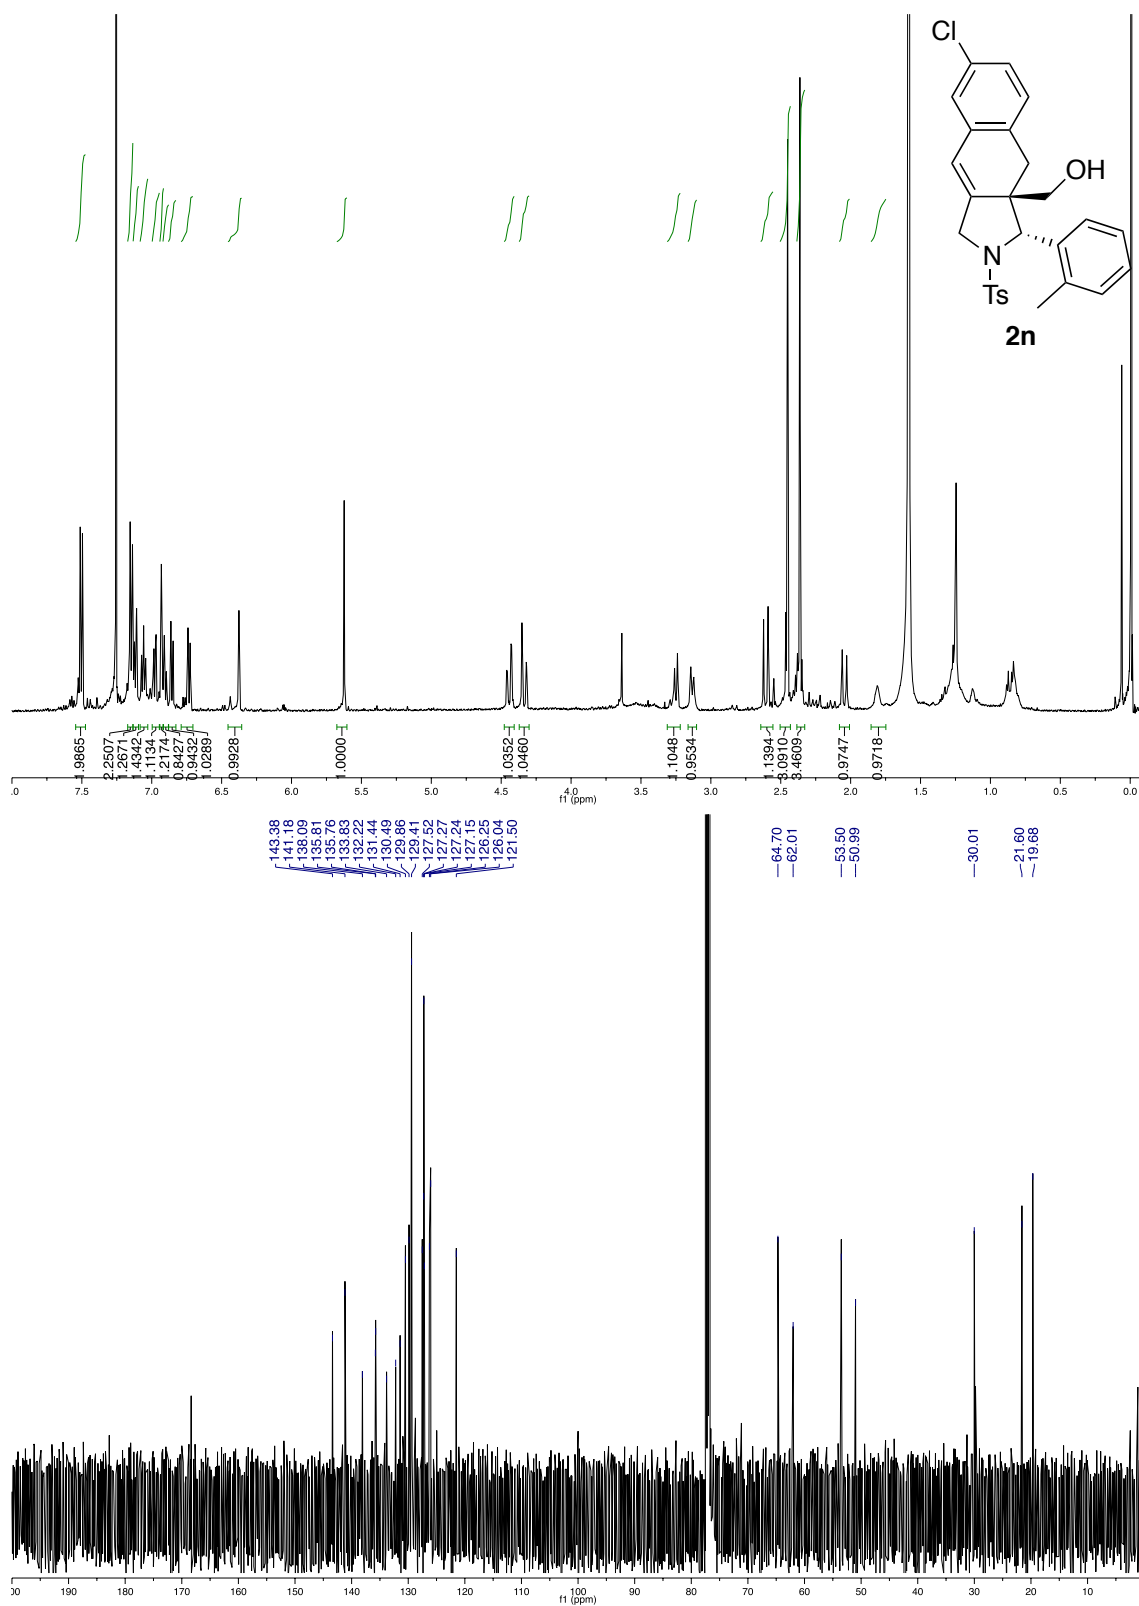

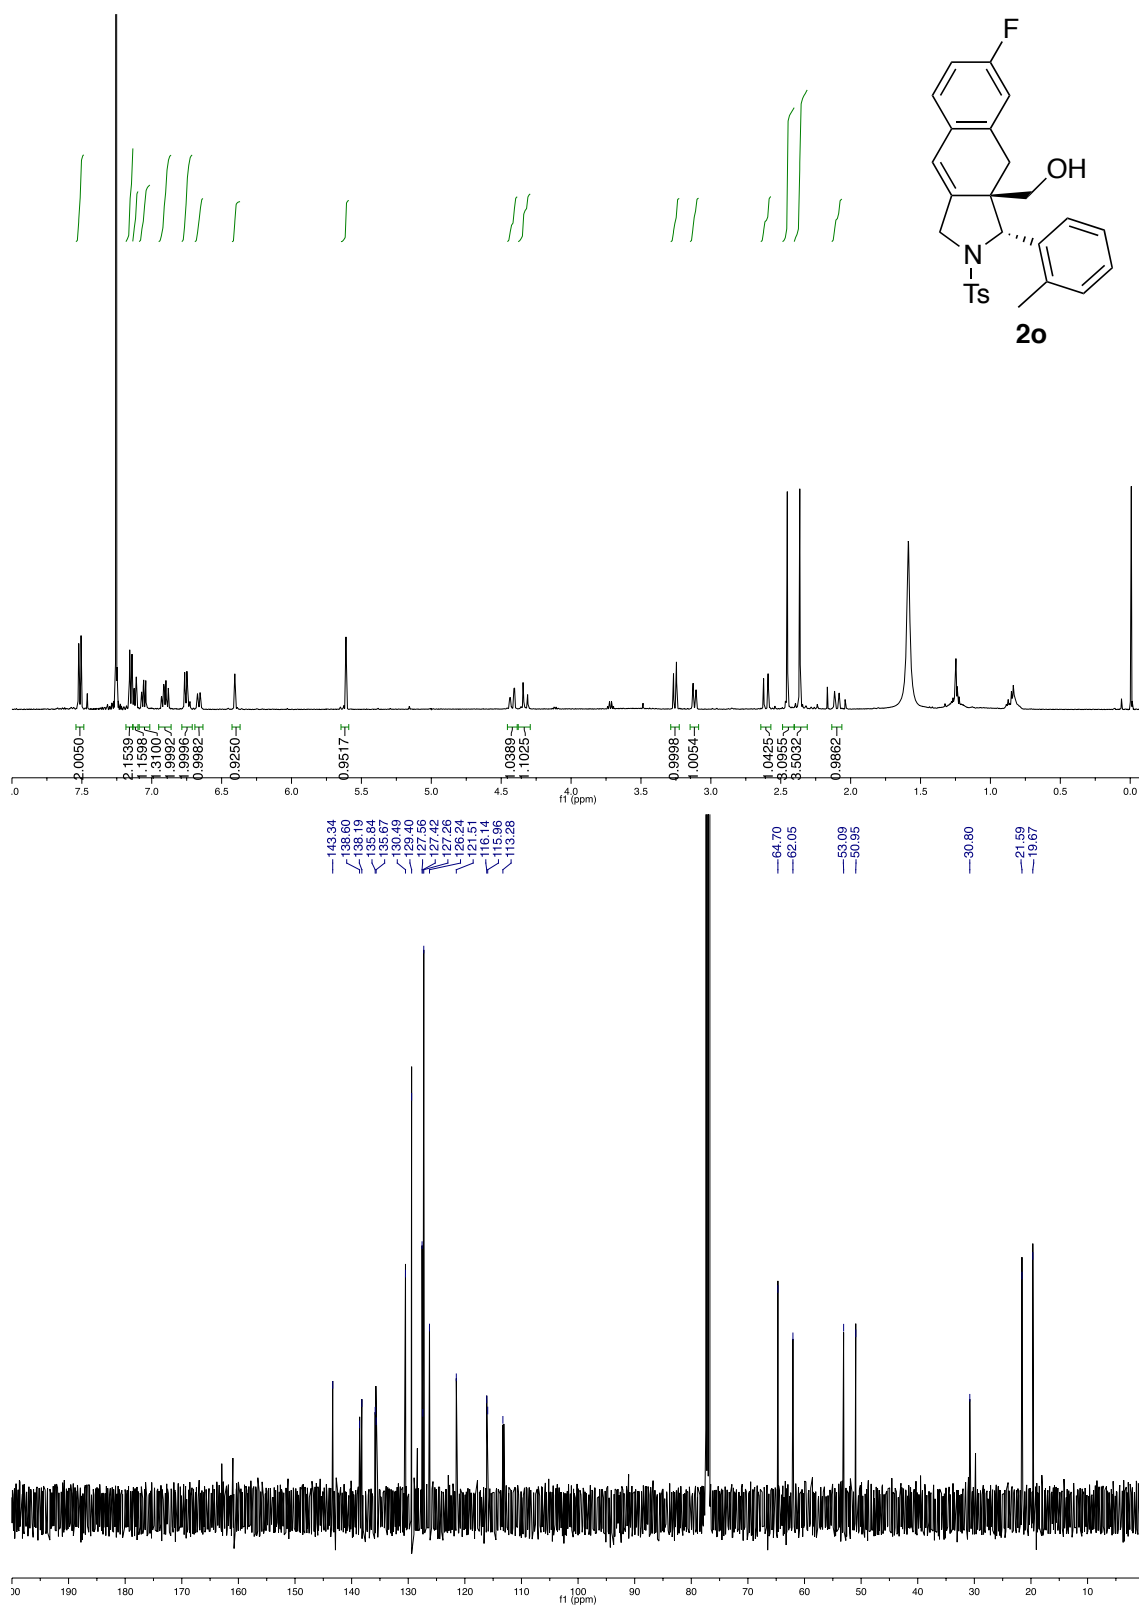



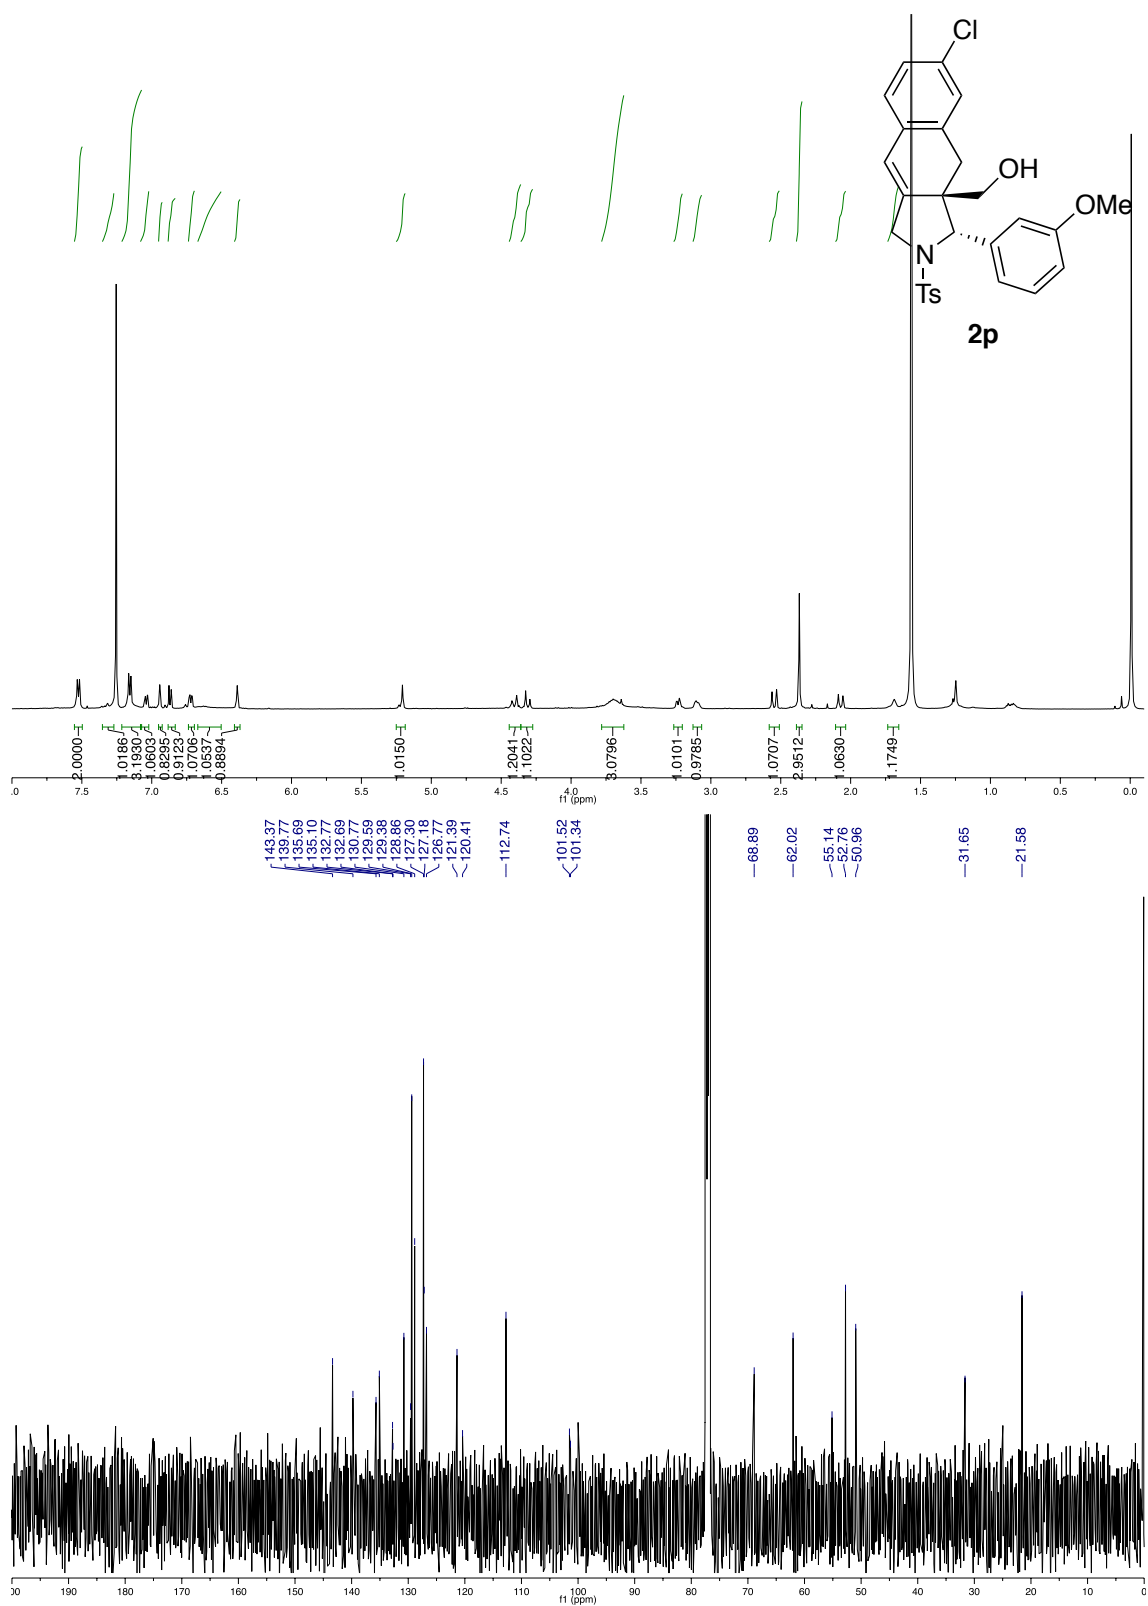

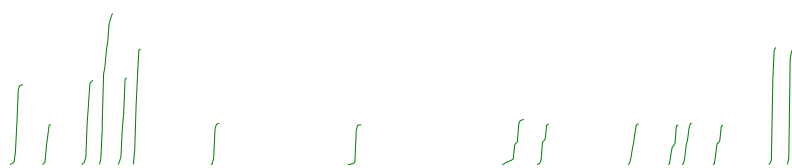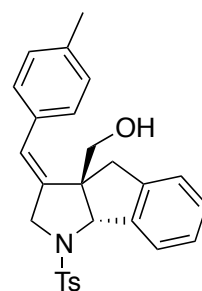

4a

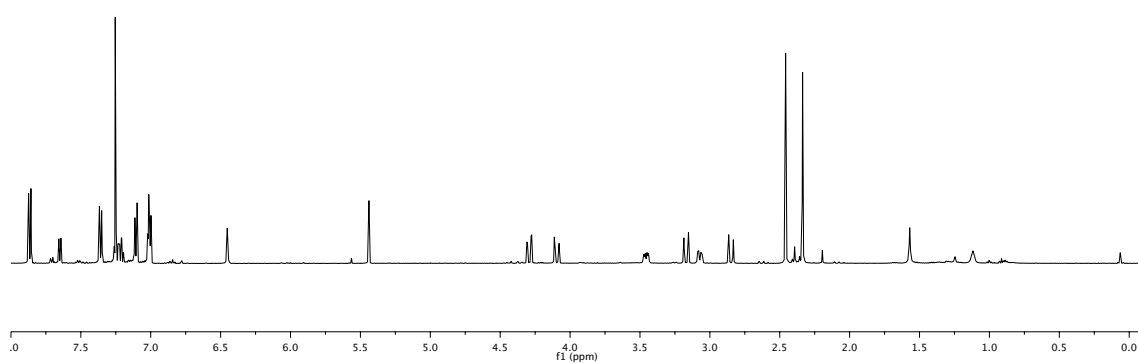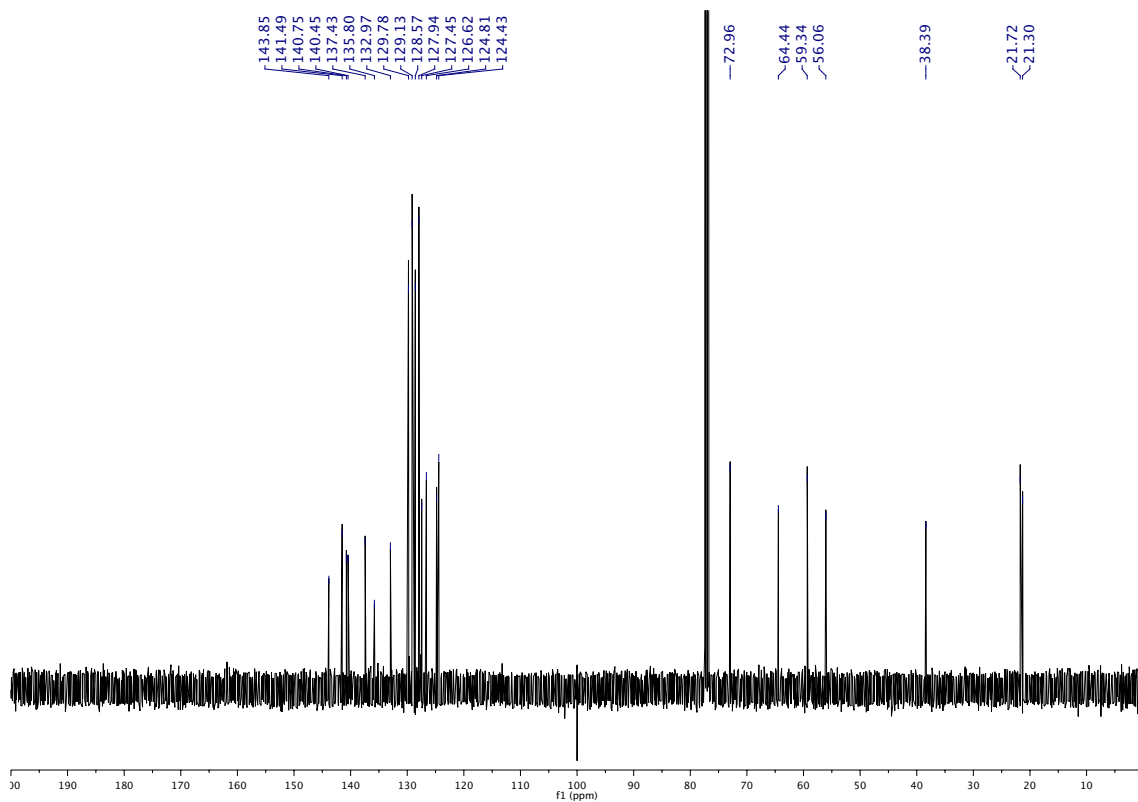

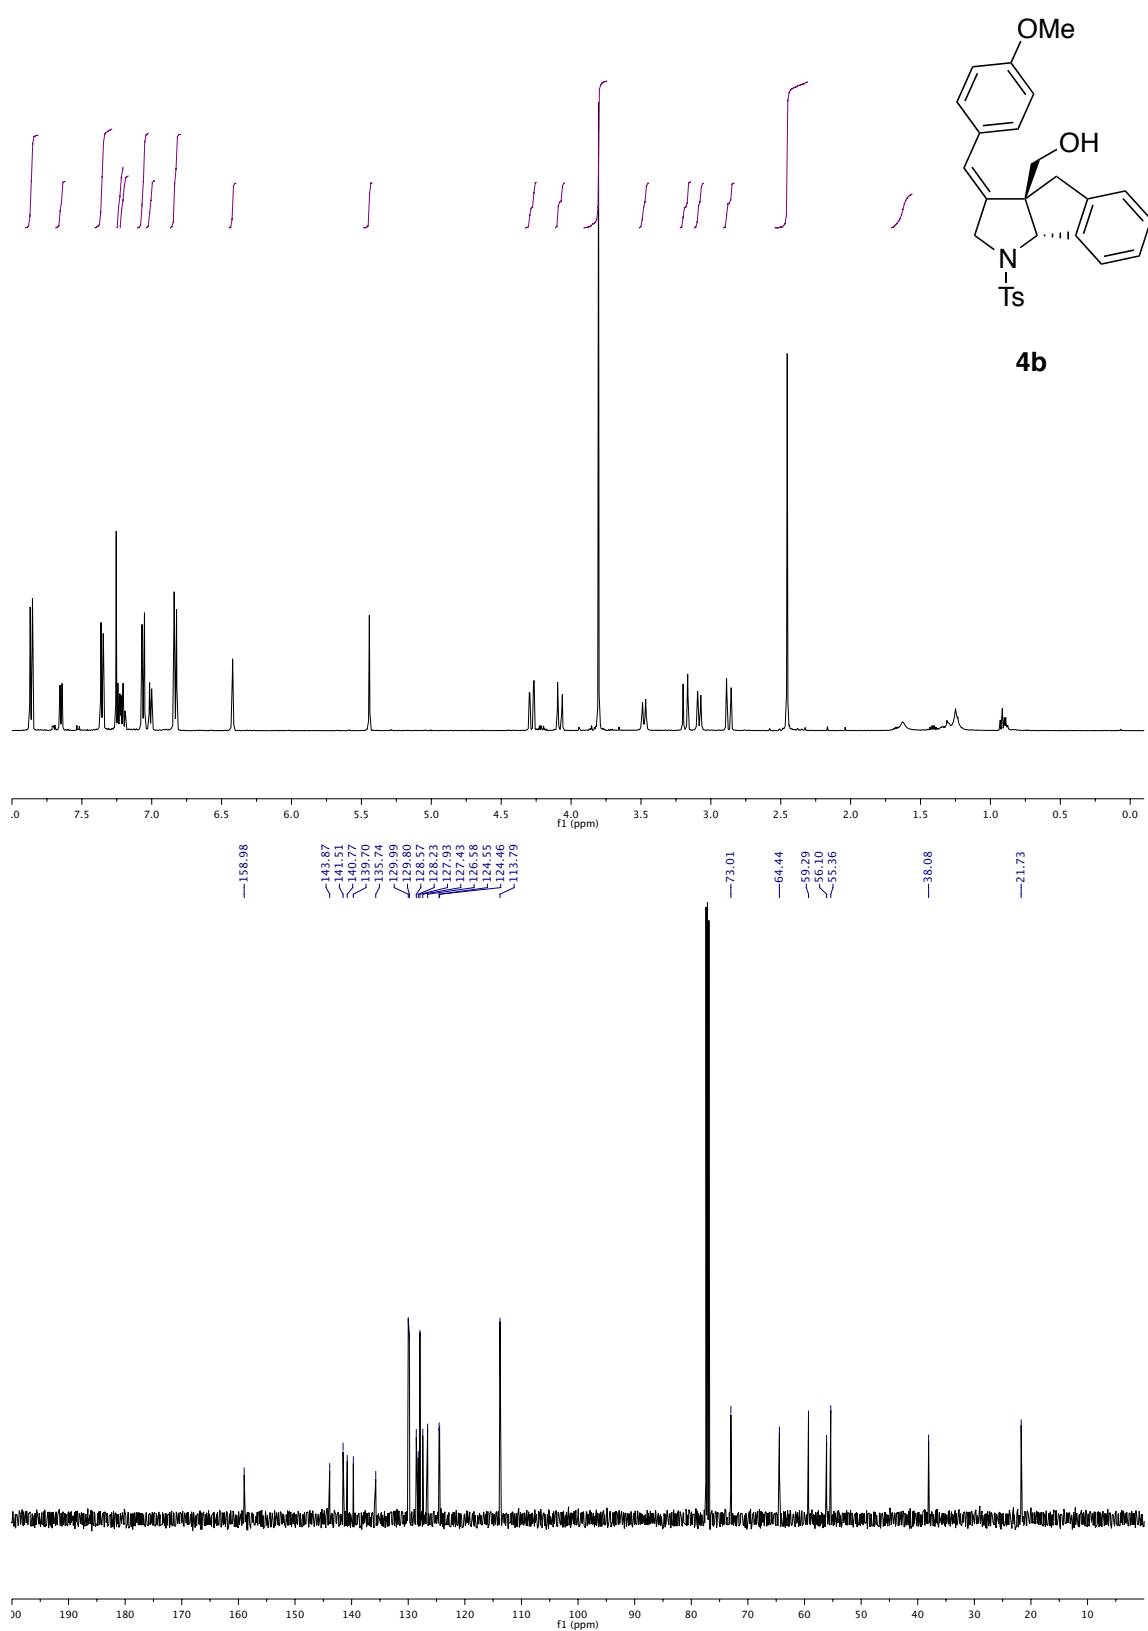

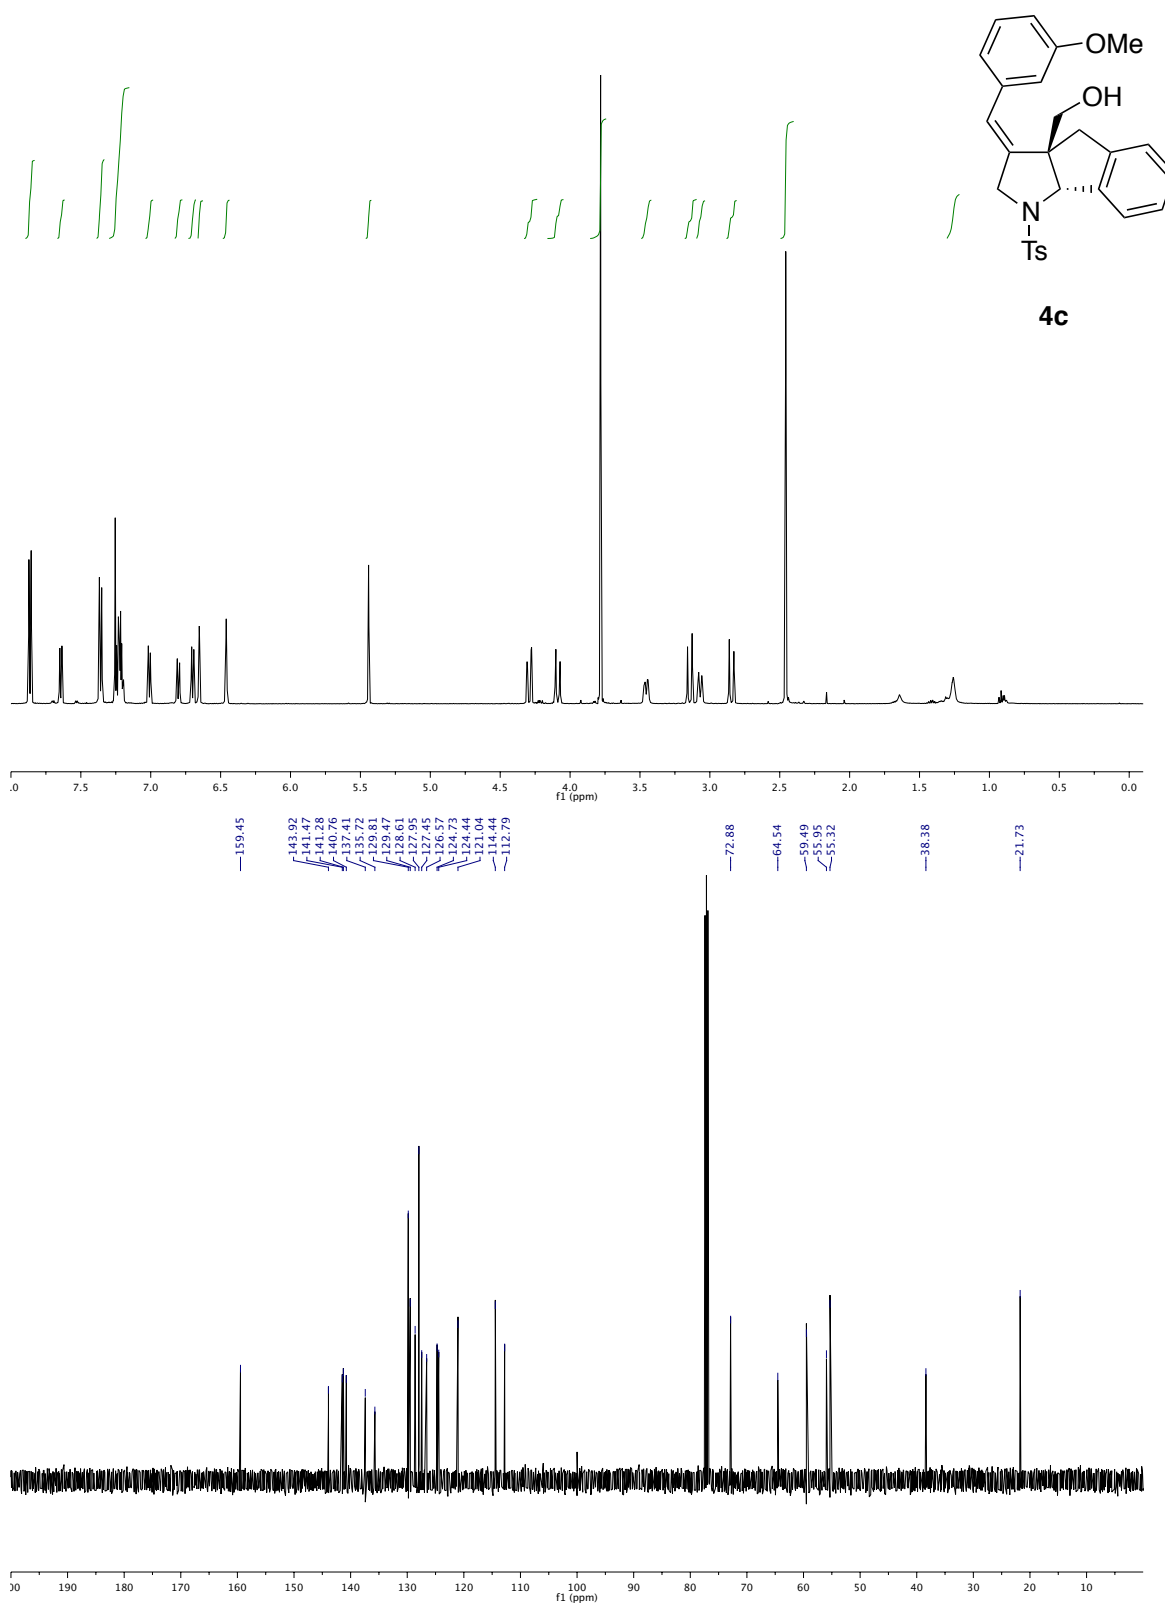

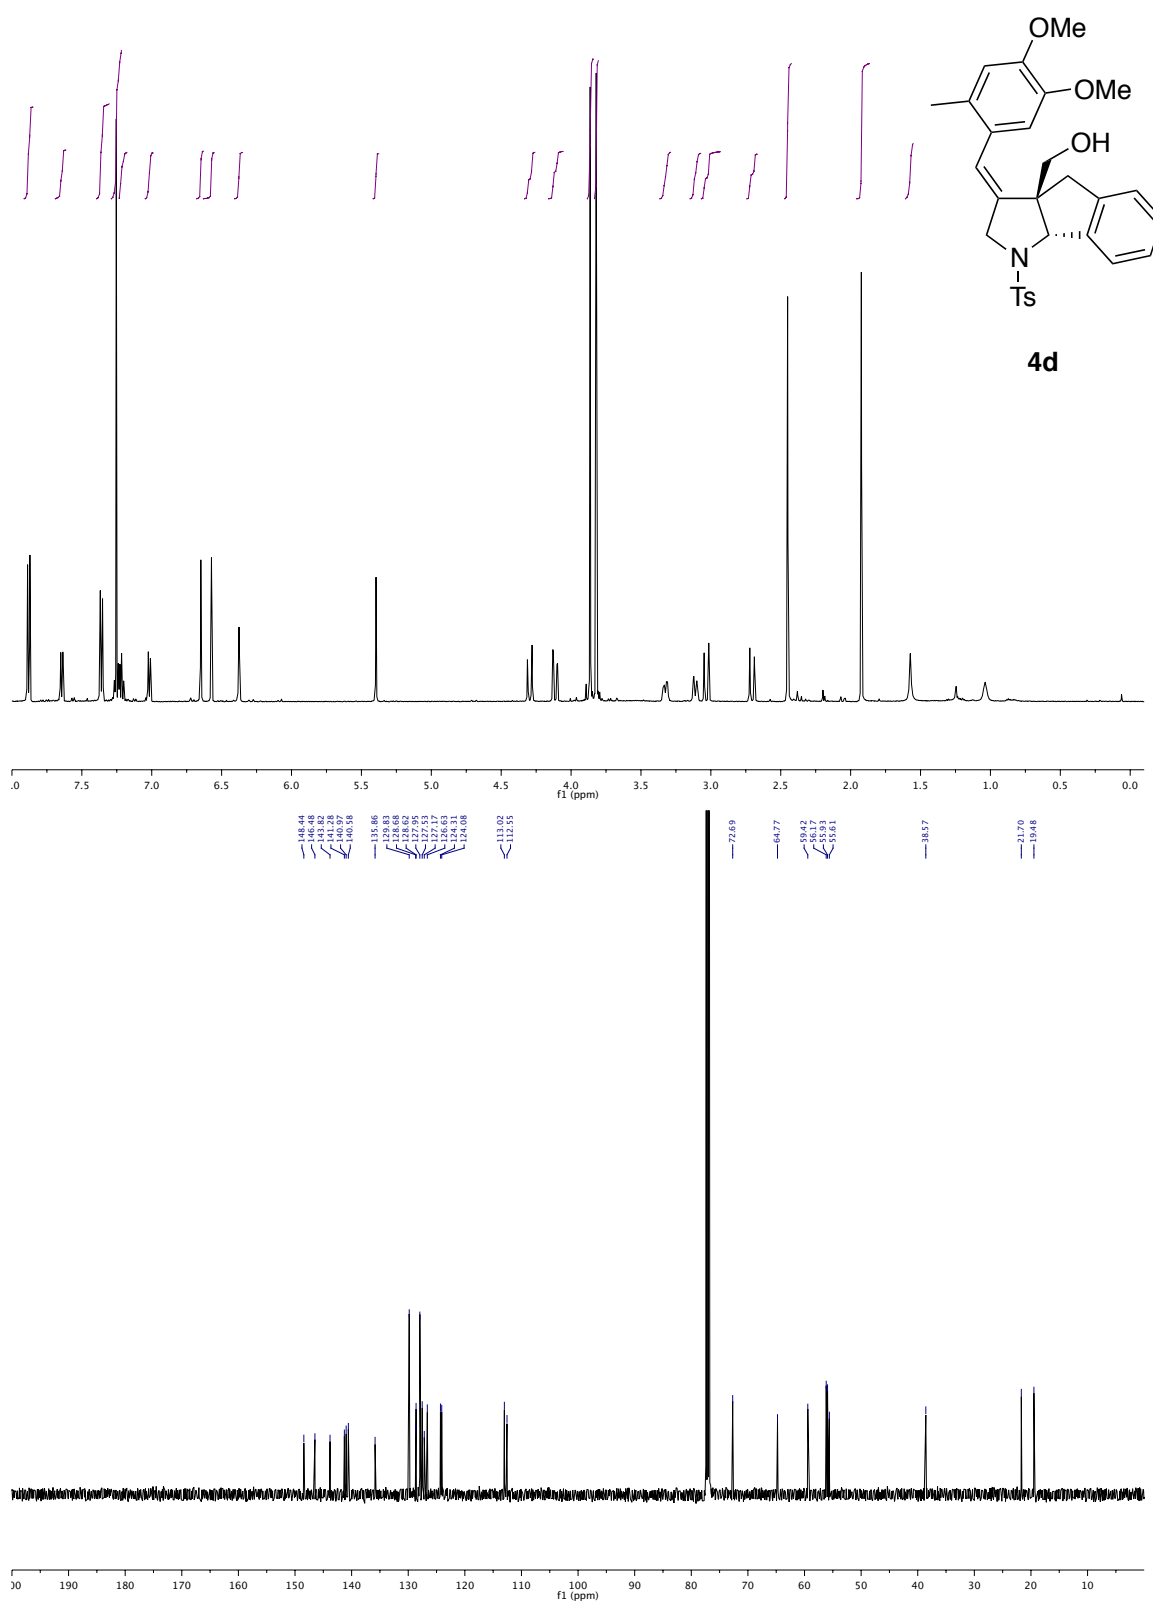

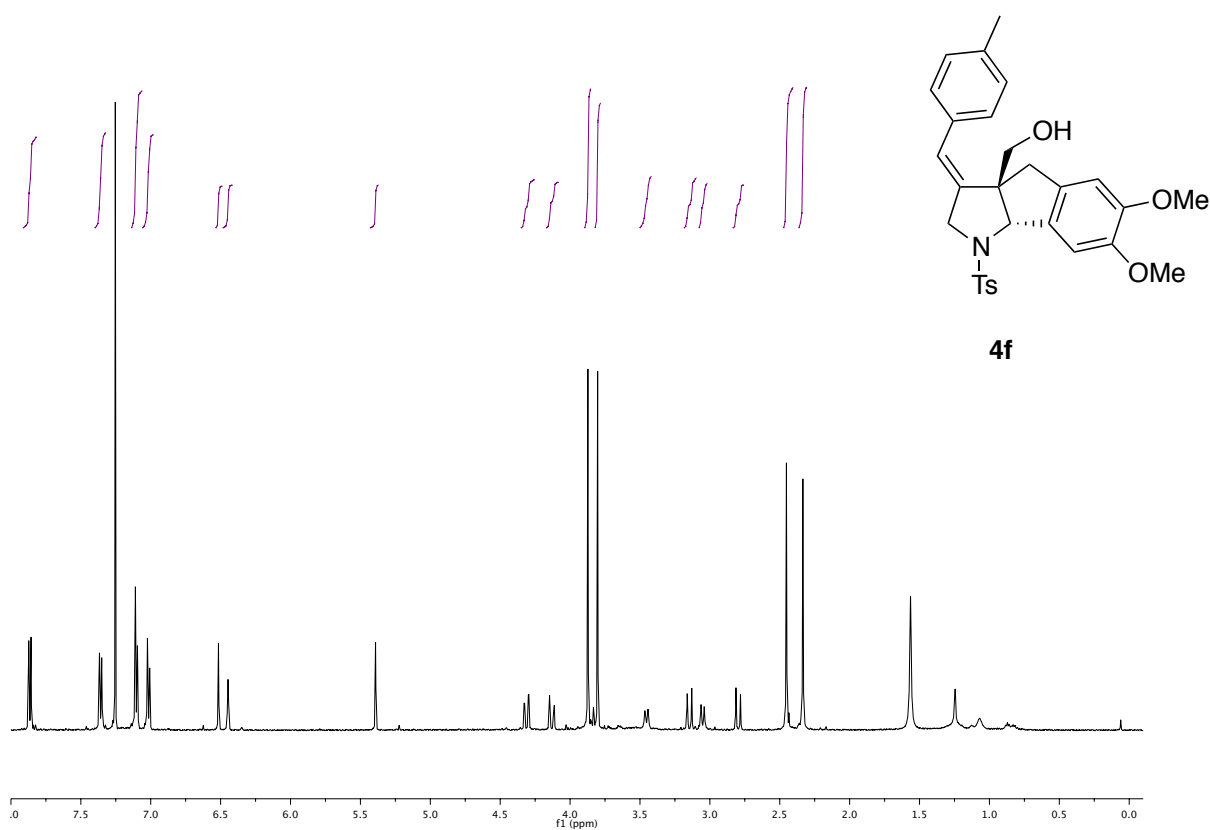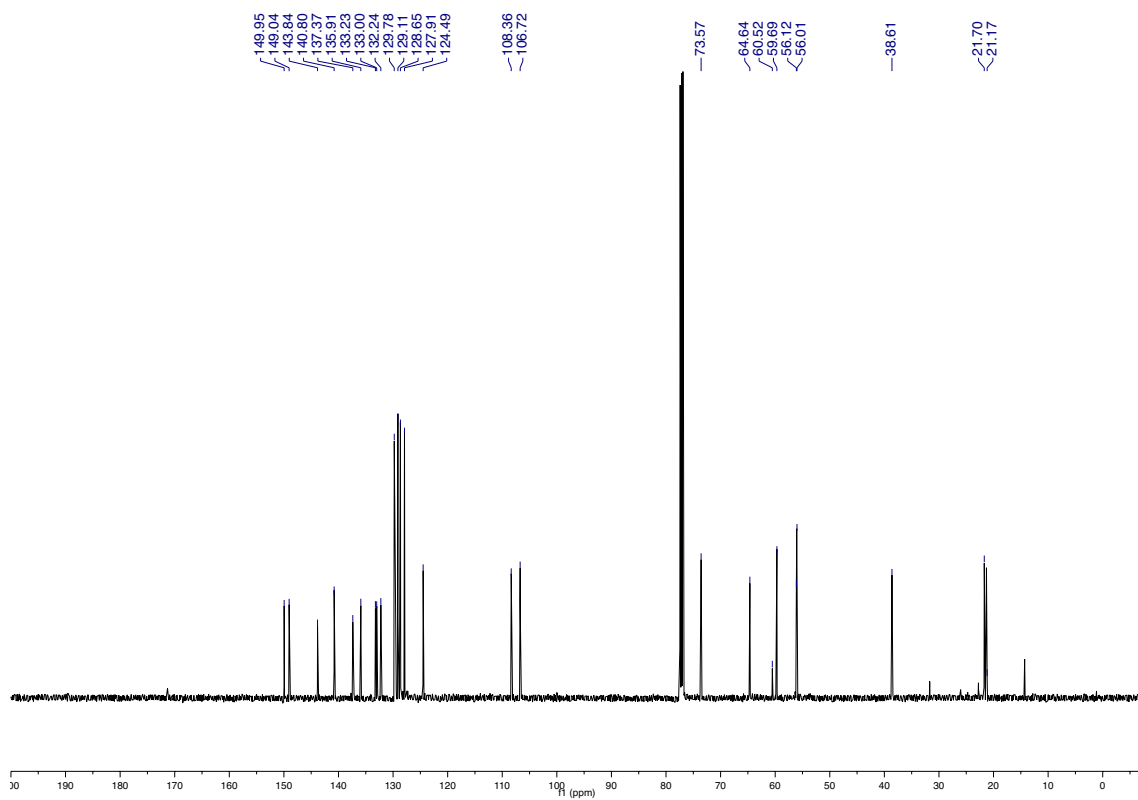

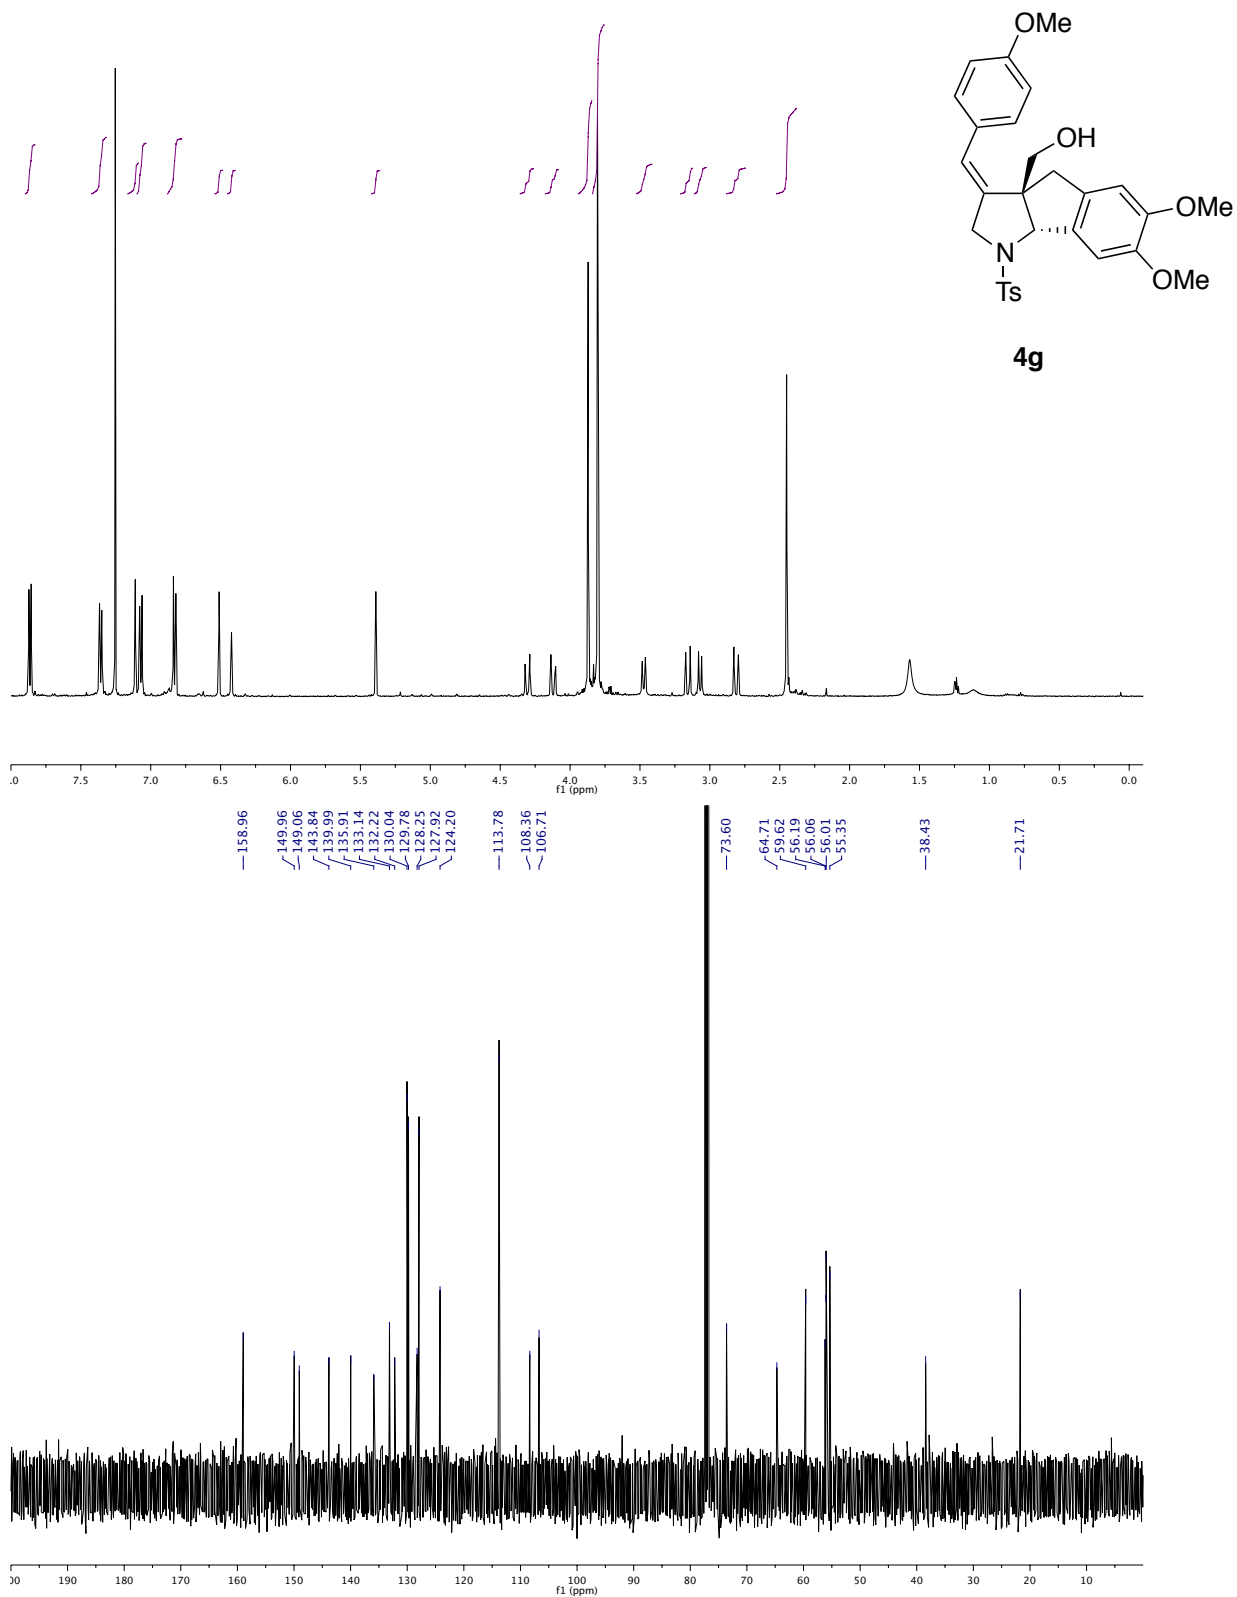

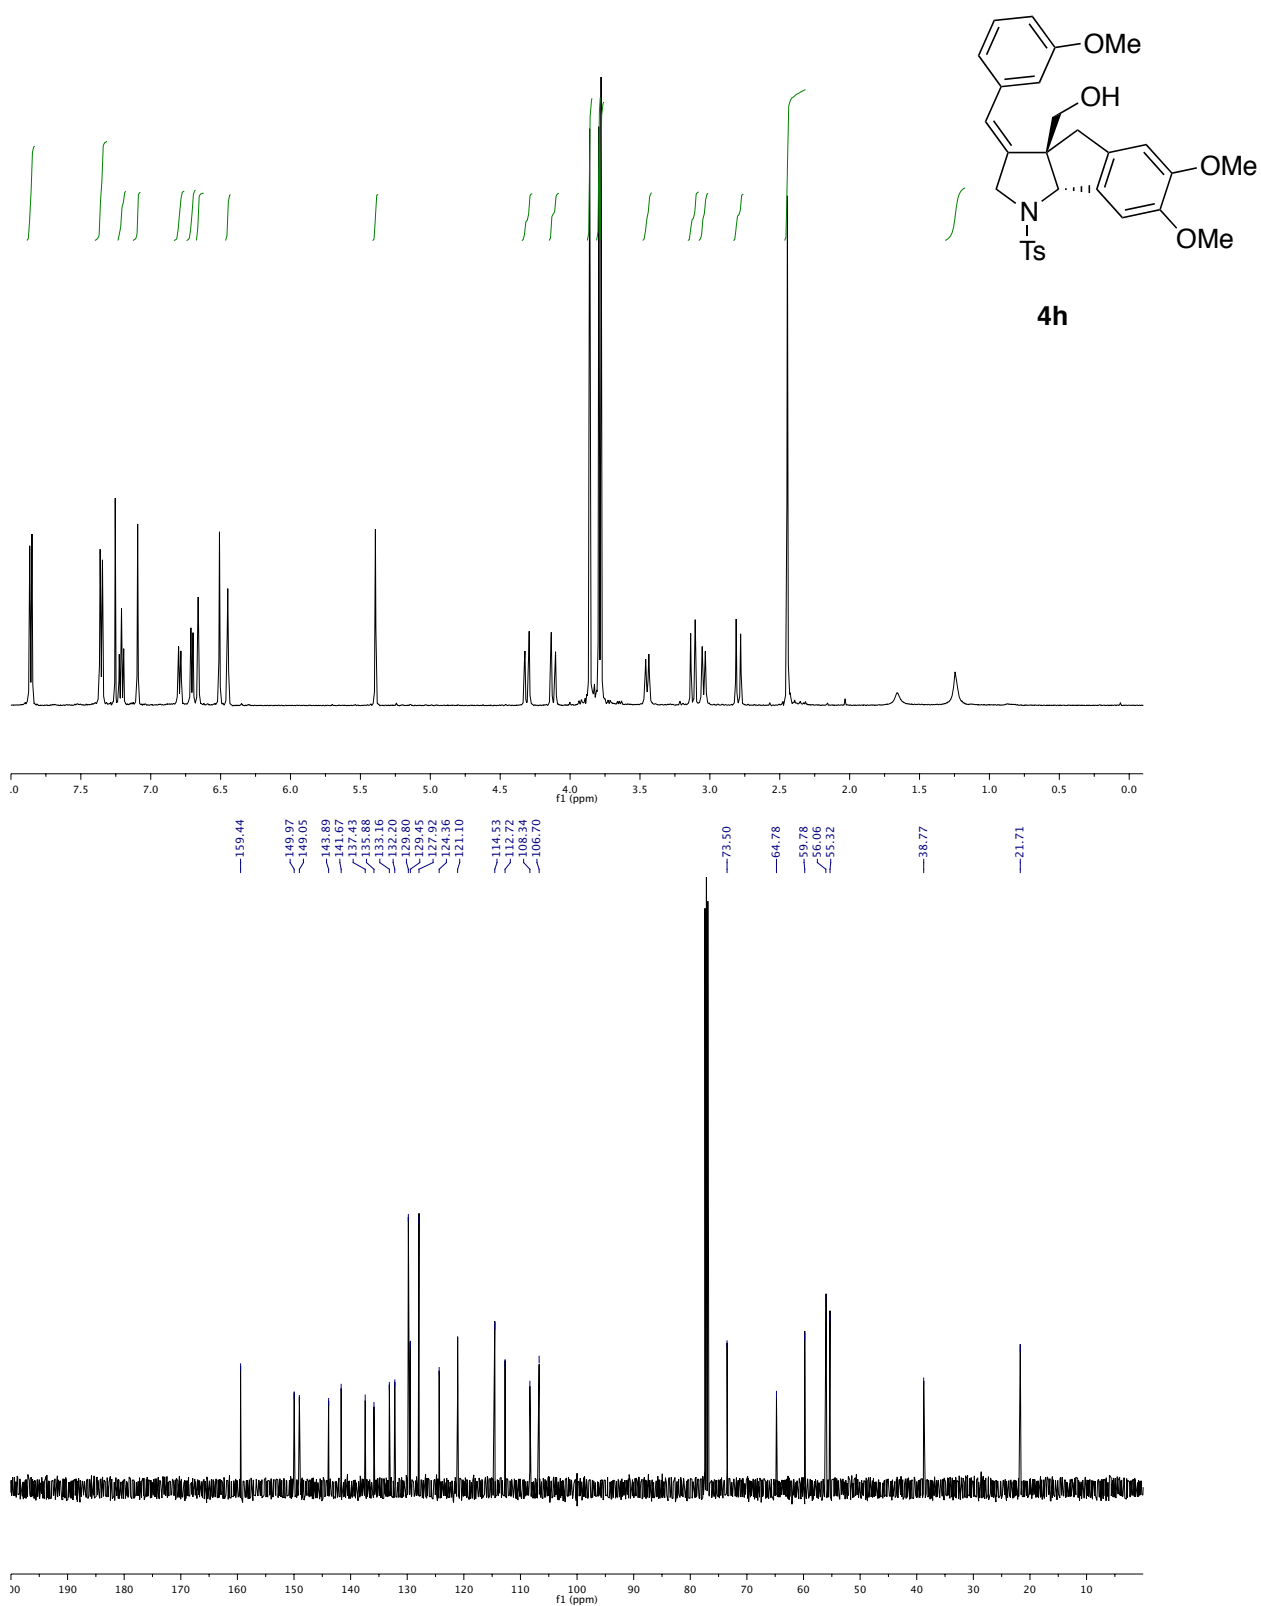



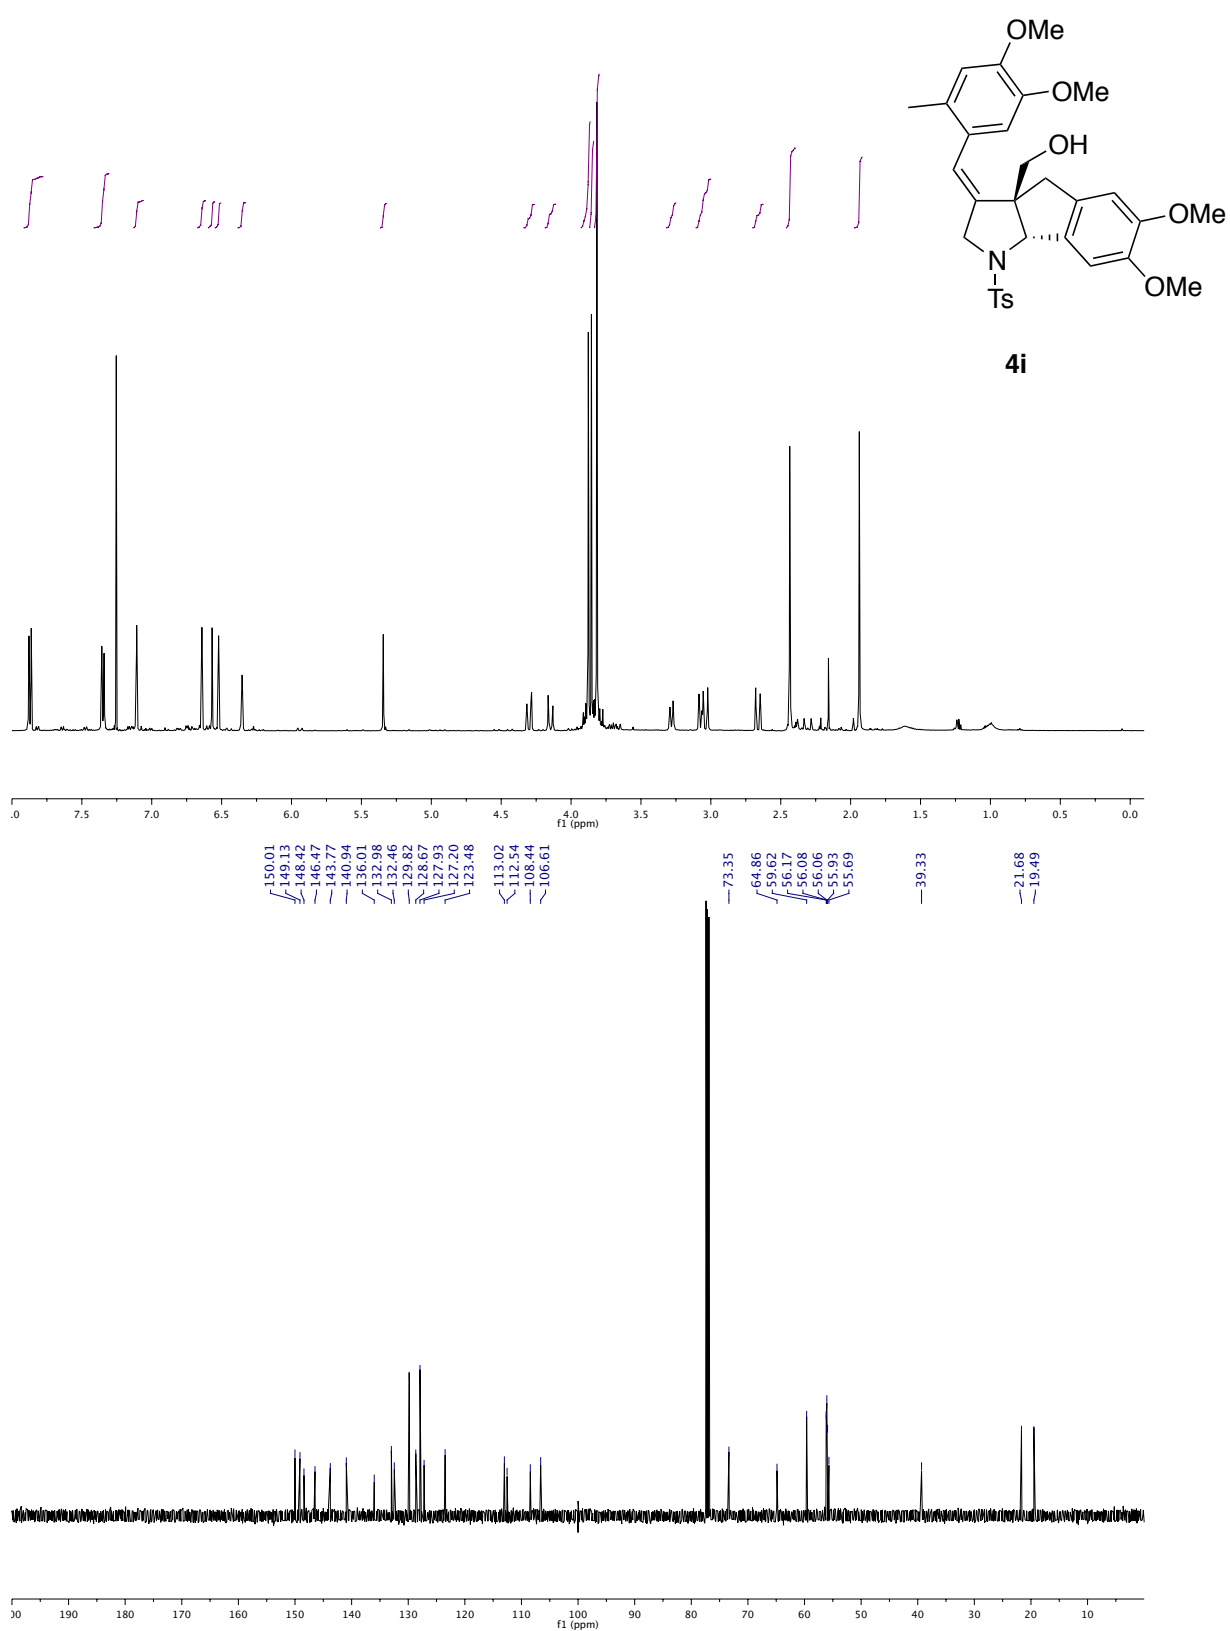

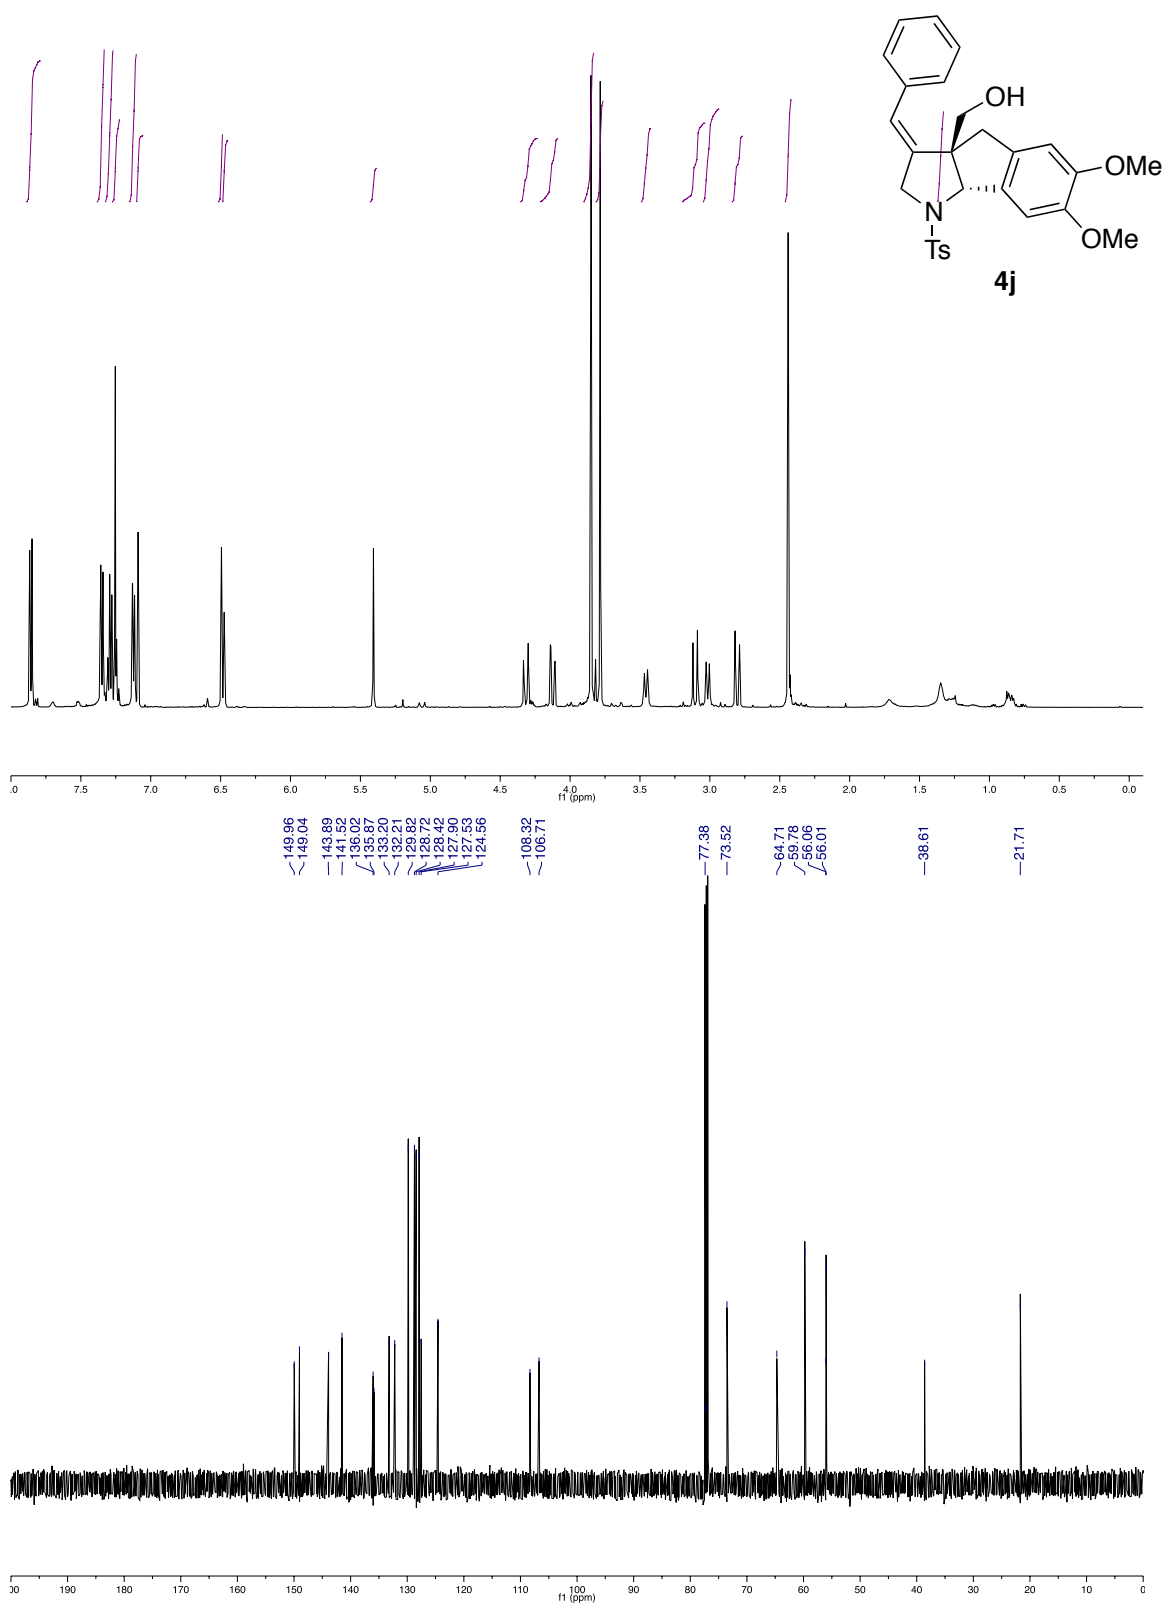

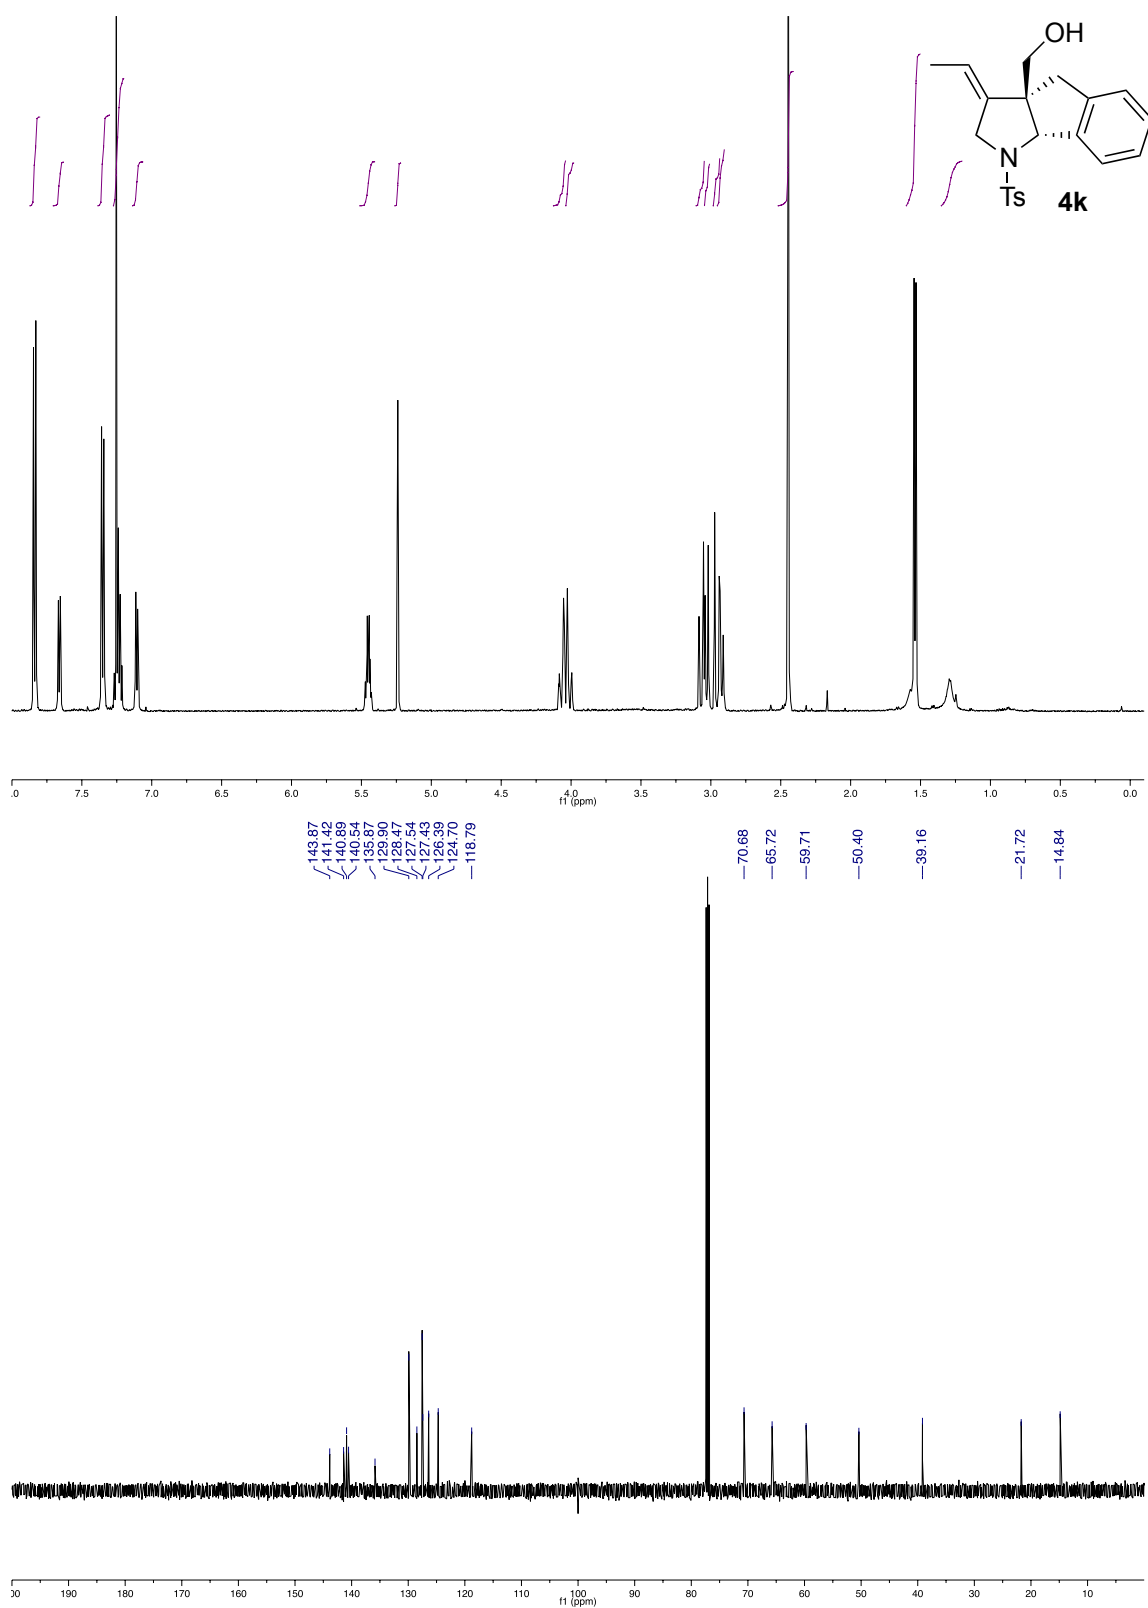

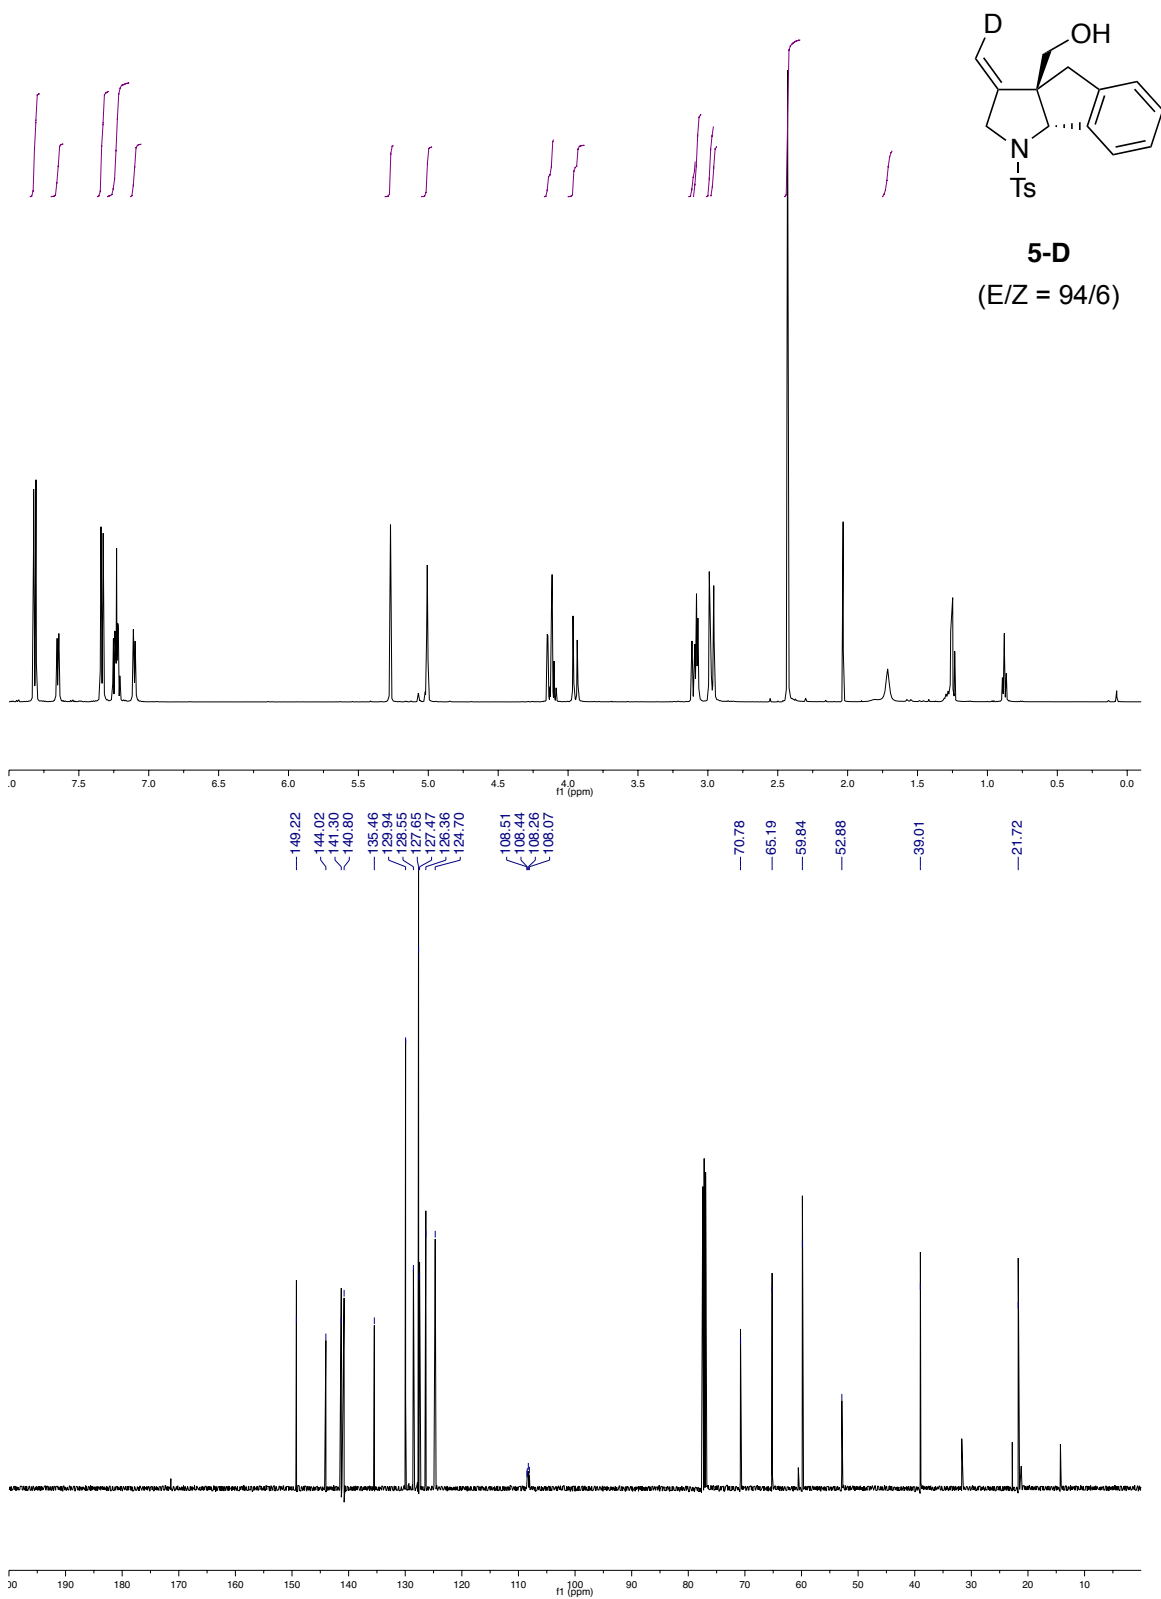

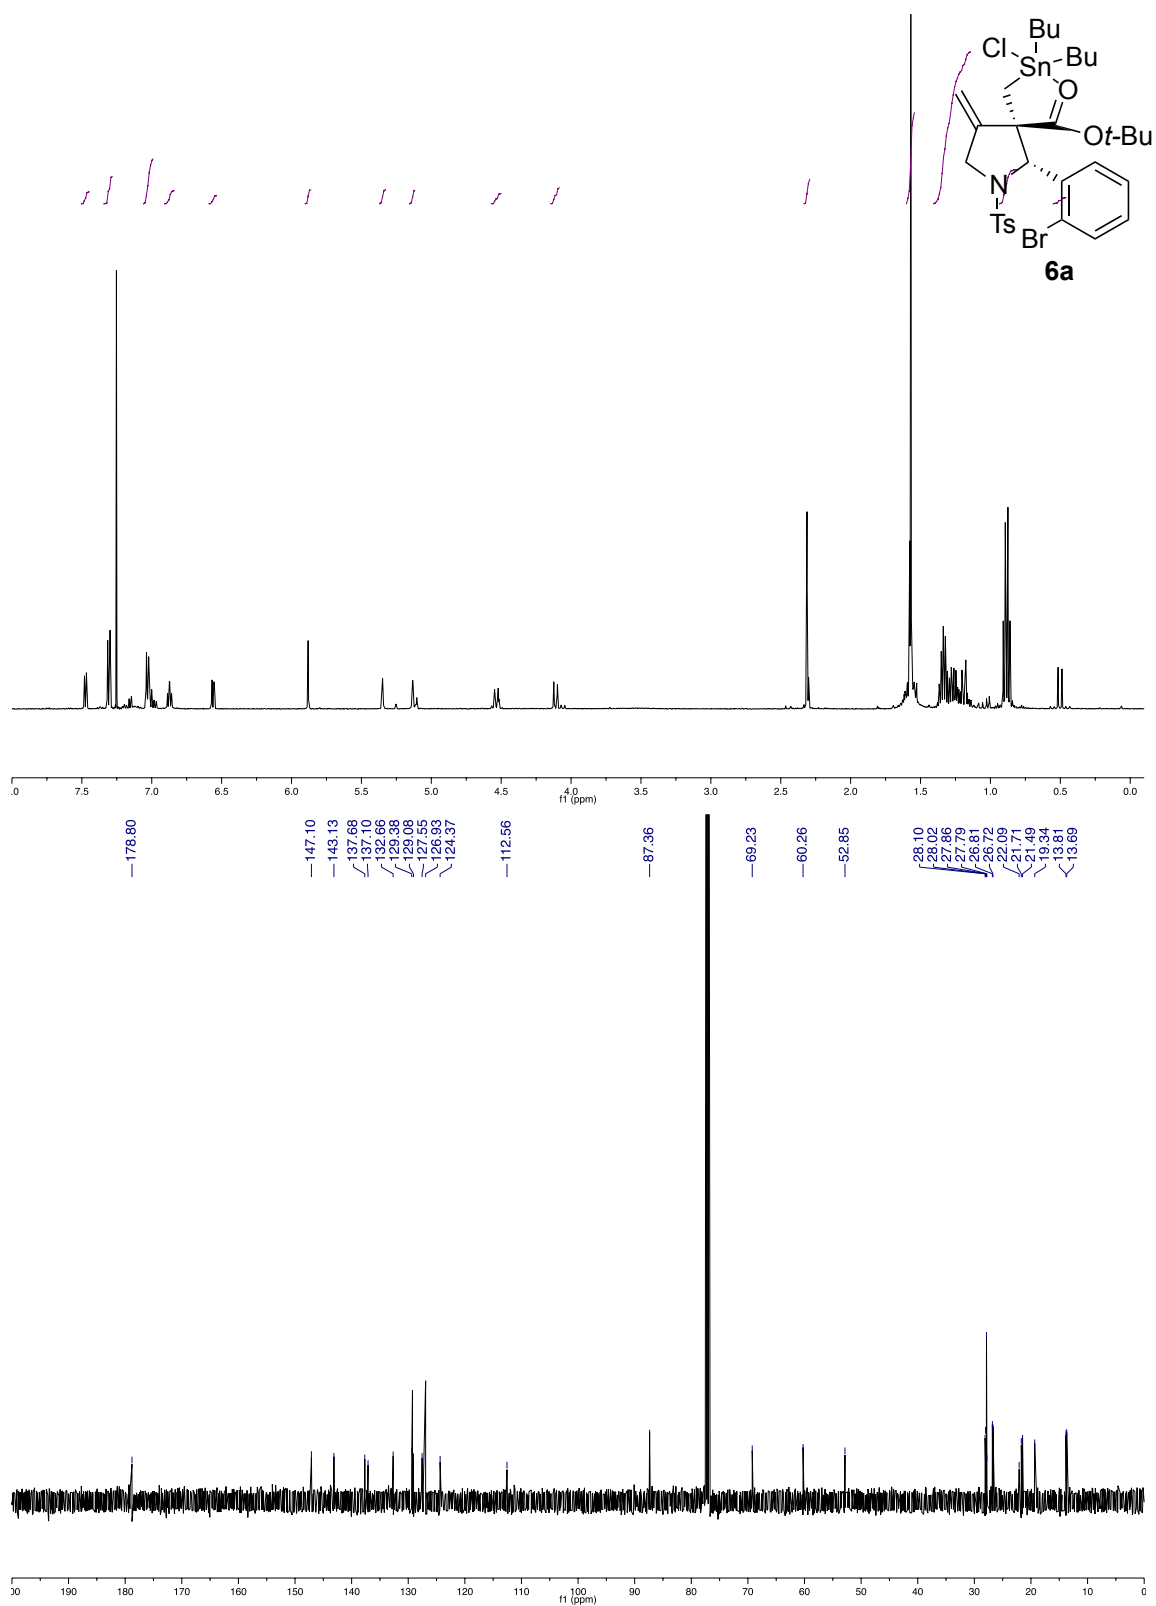

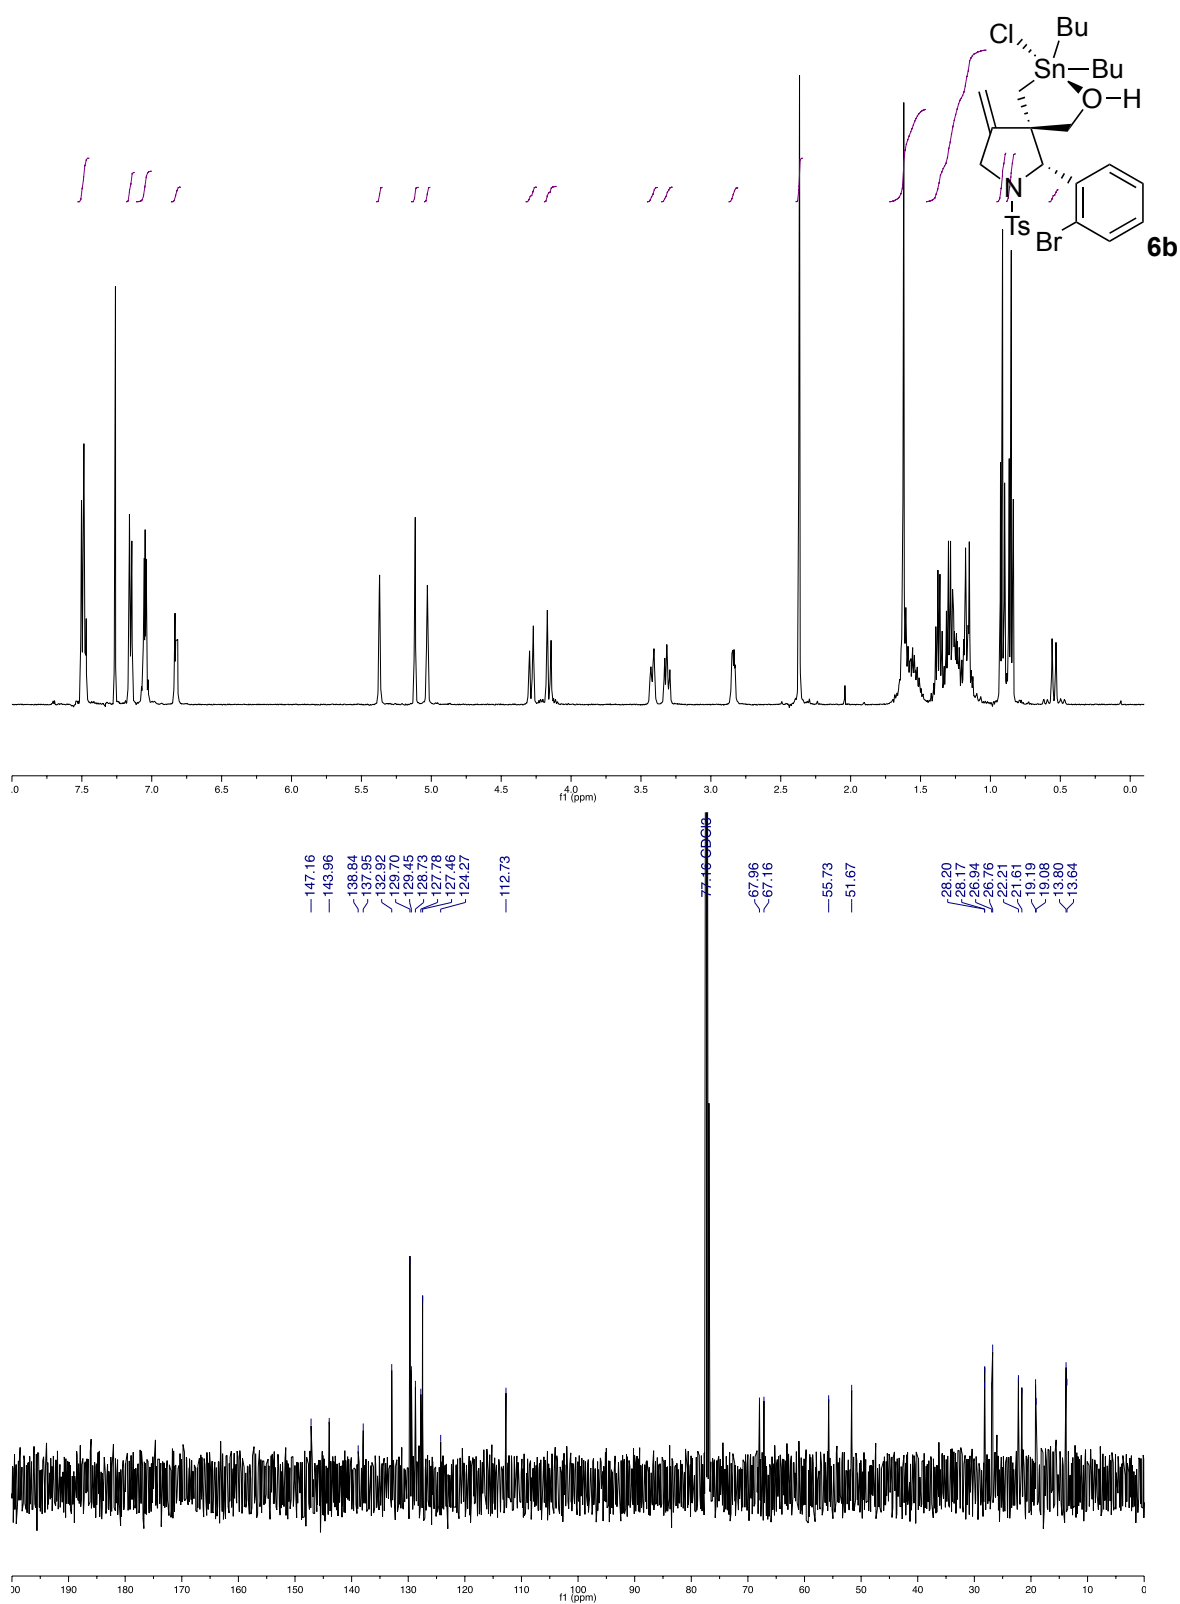

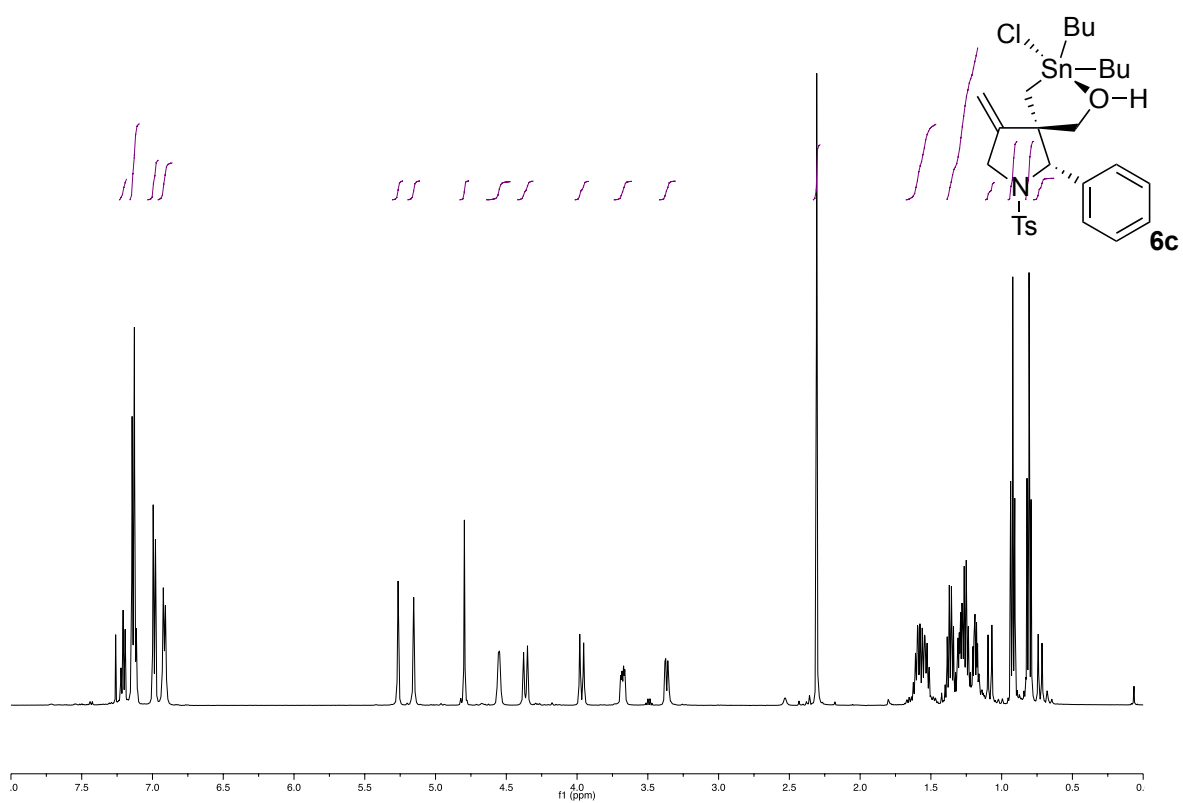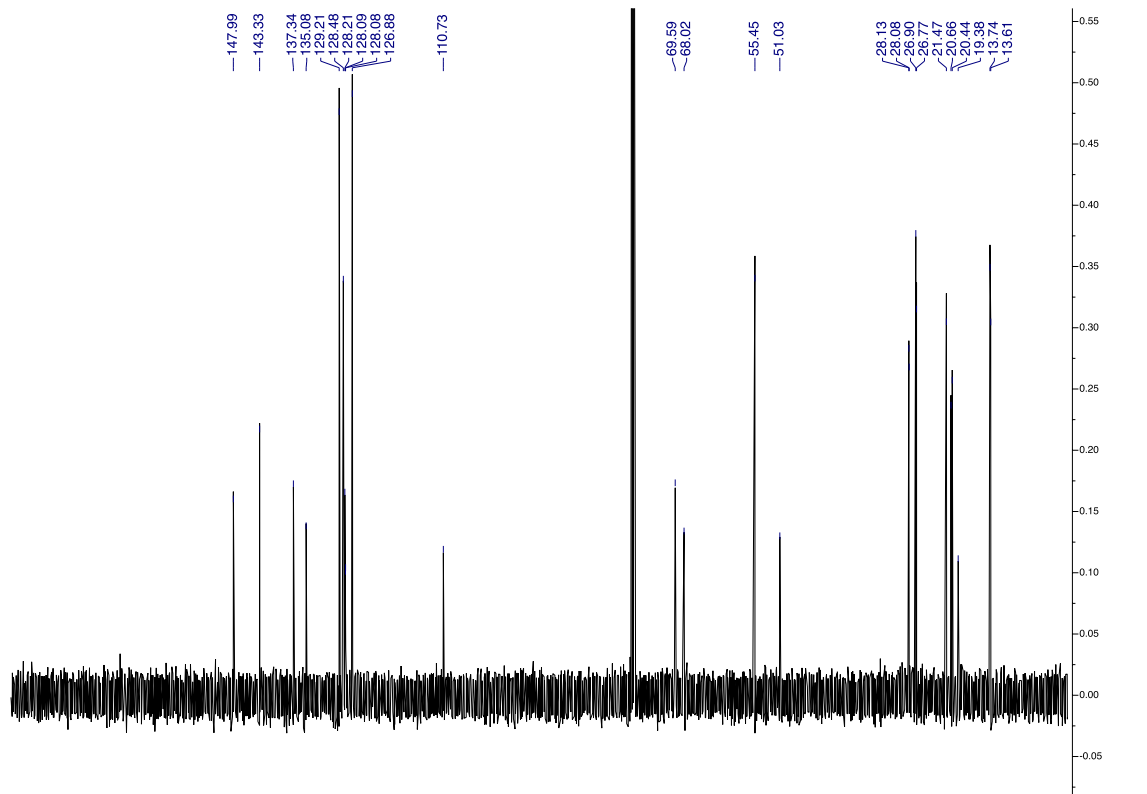

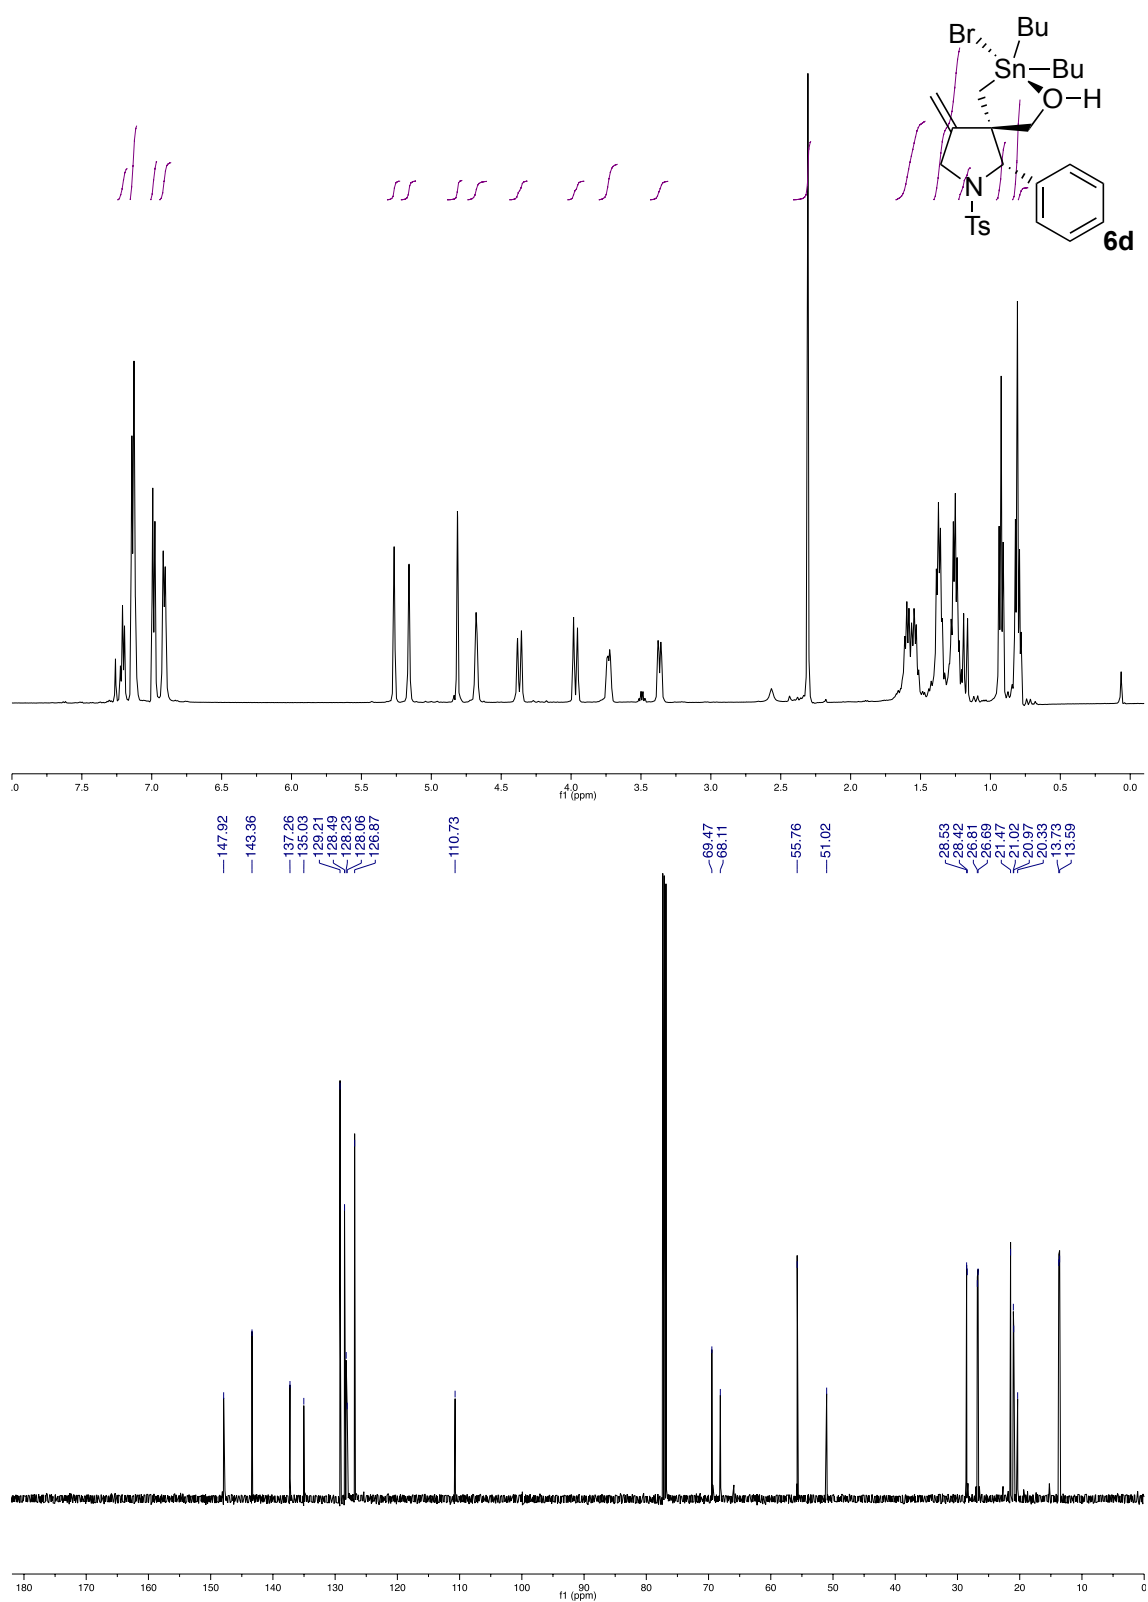

147.92  
143.36  
137.26  
135.03  
129.21  
128.49  
128.23  
128.06  
126.87  
110.73  
69.47  
68.11  
55.76  
51.02  
28.53  
28.32  
26.81  
26.69  
21.47  
21.02  
20.97  
20.33  
13.53



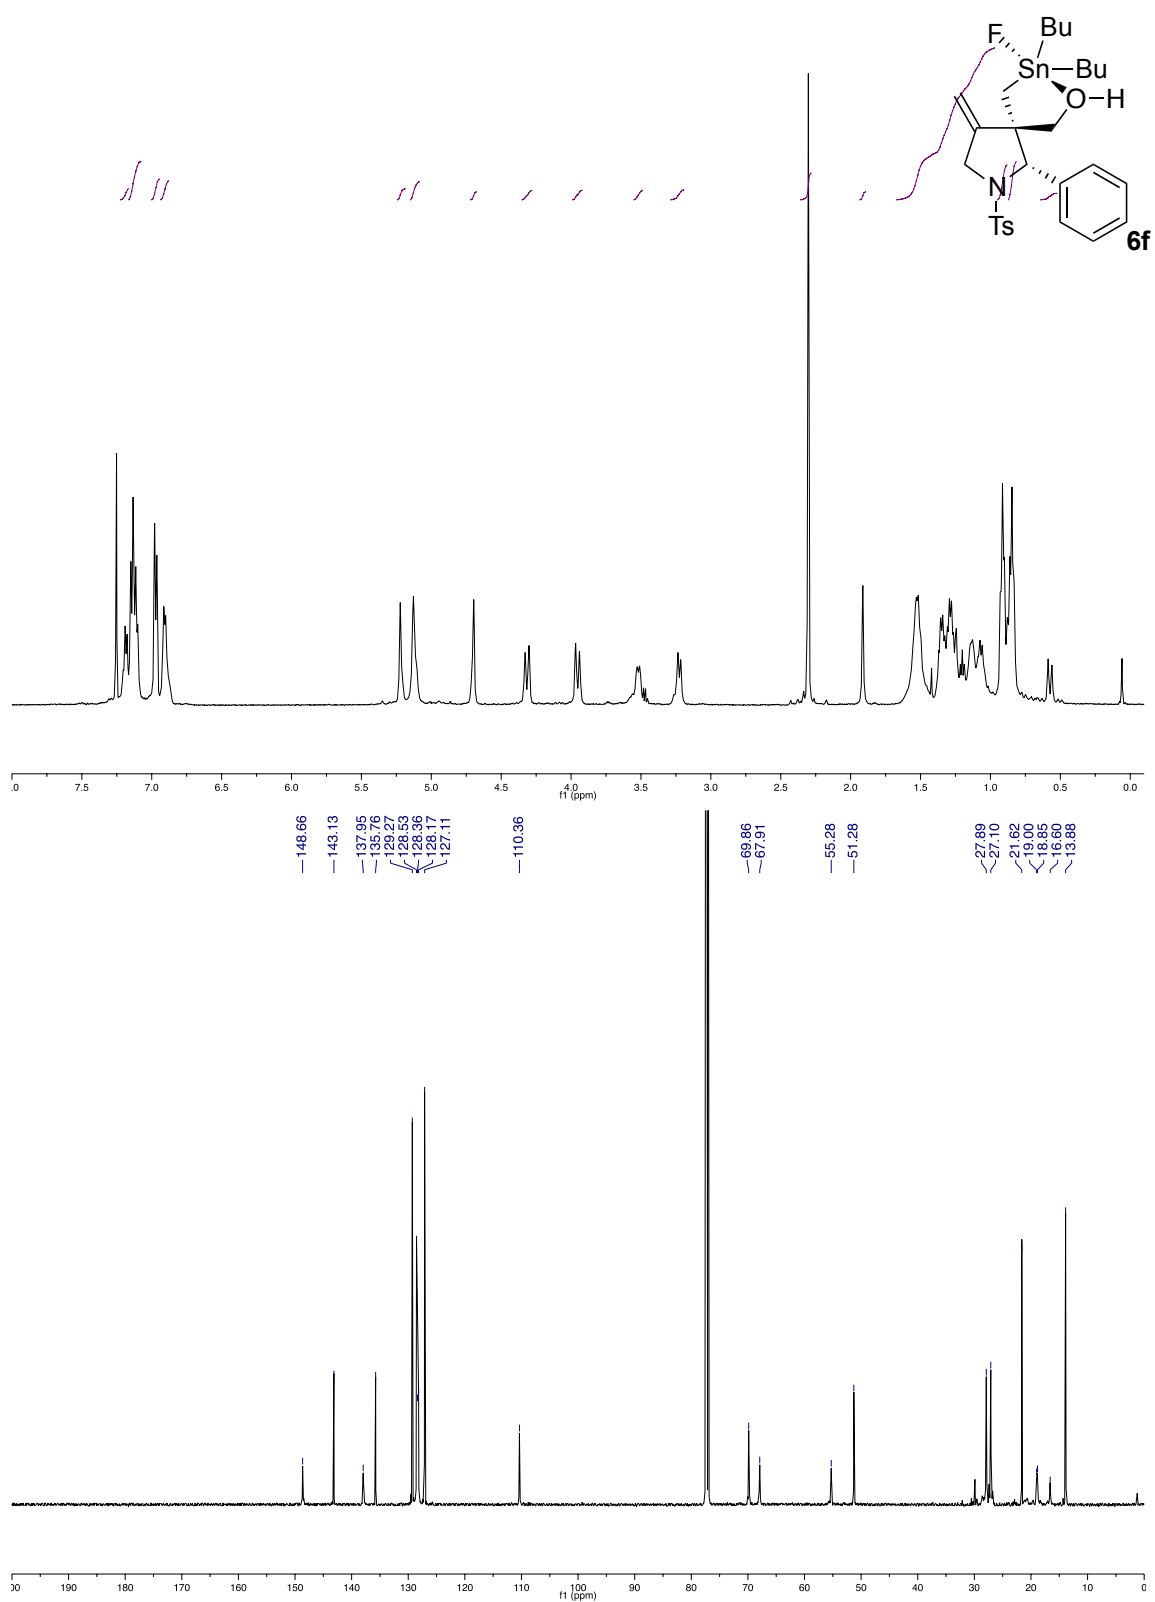

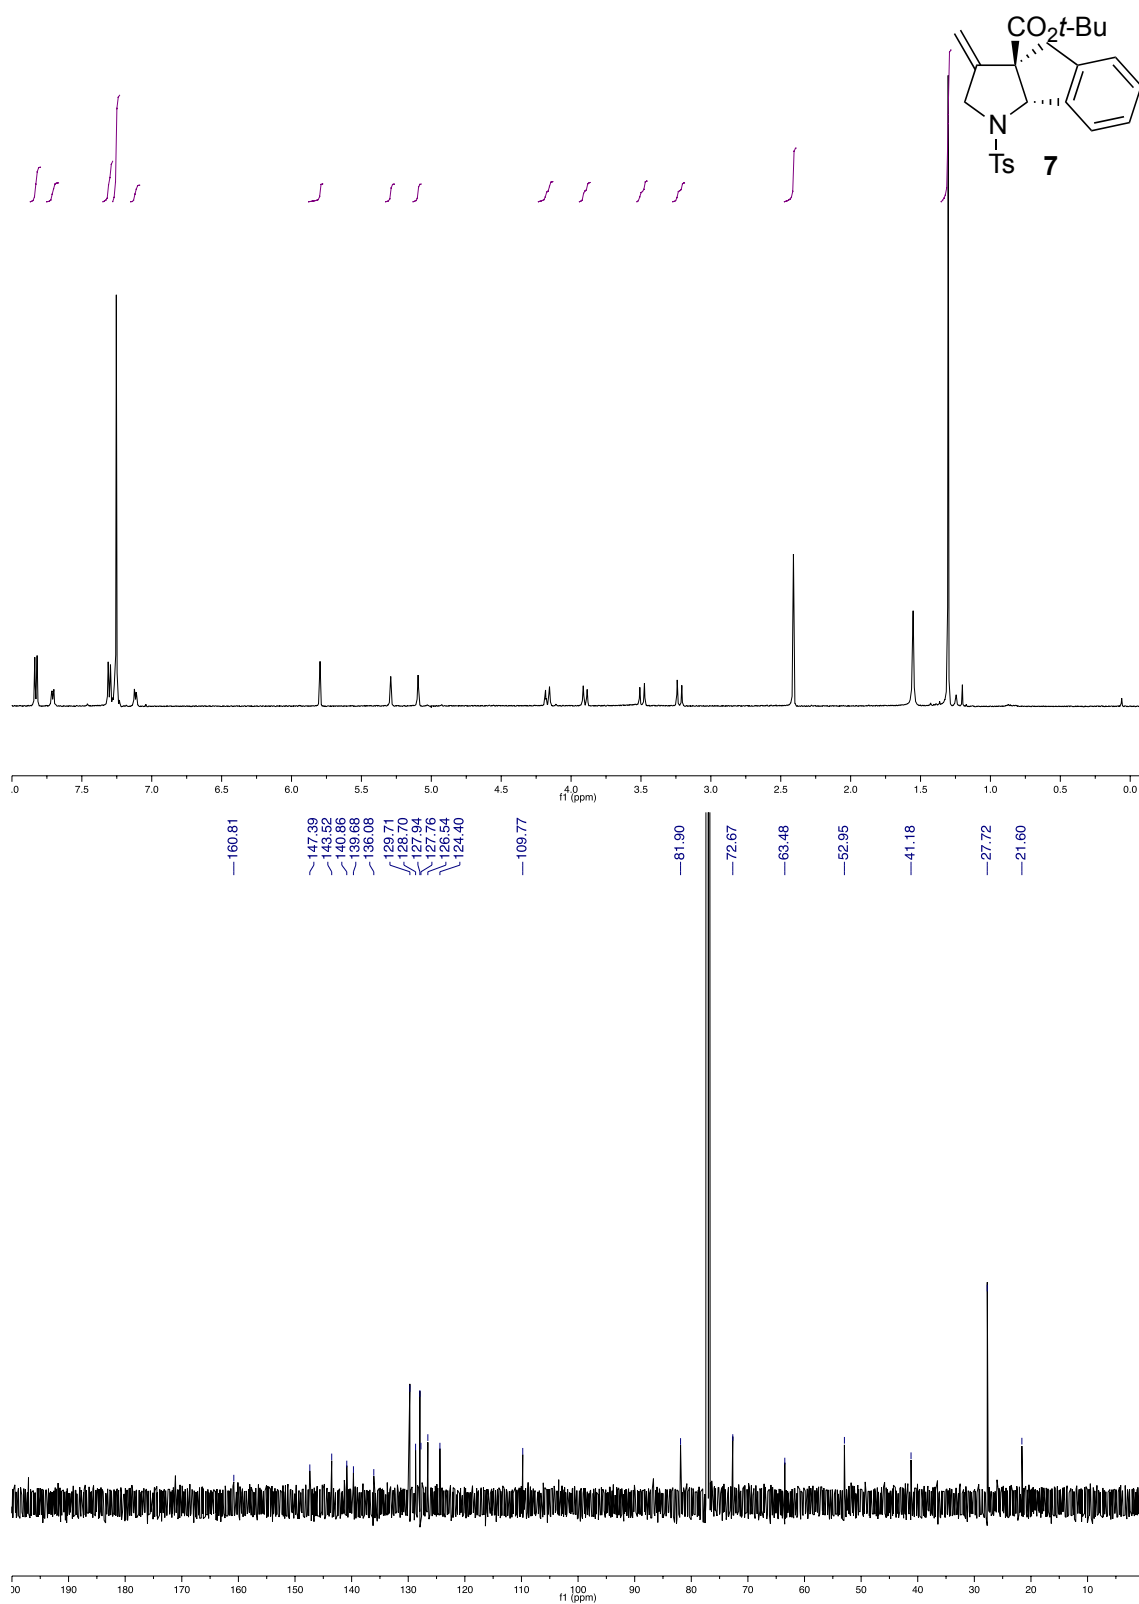

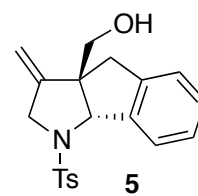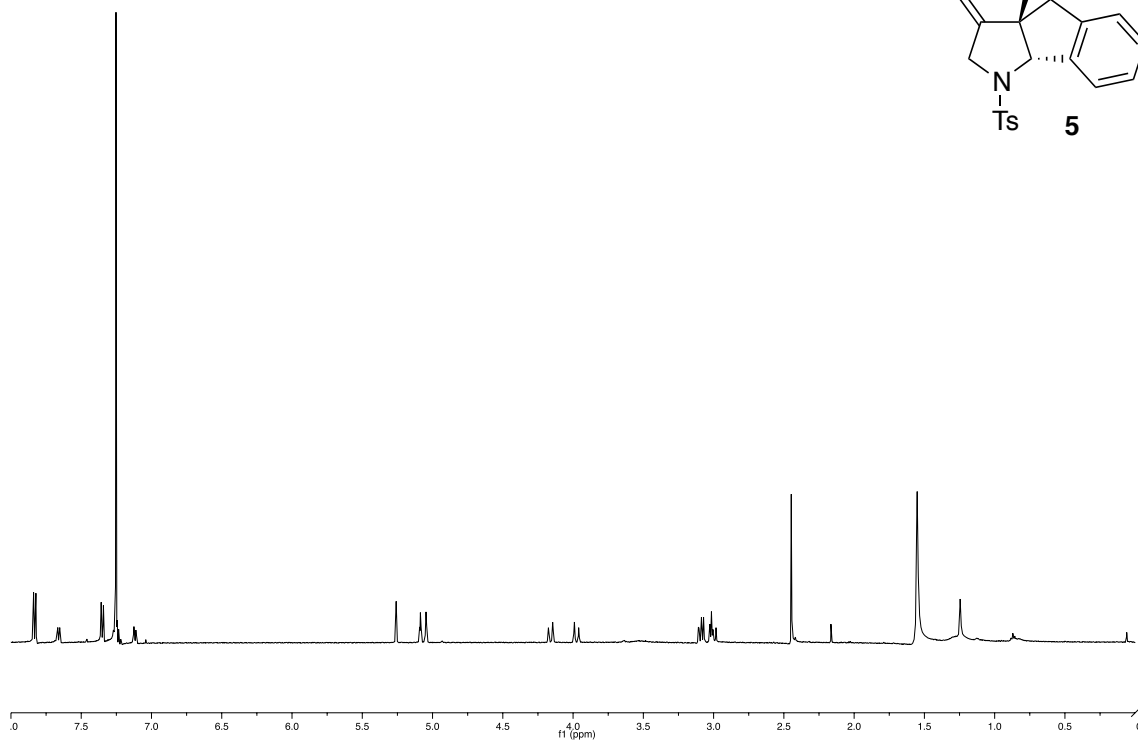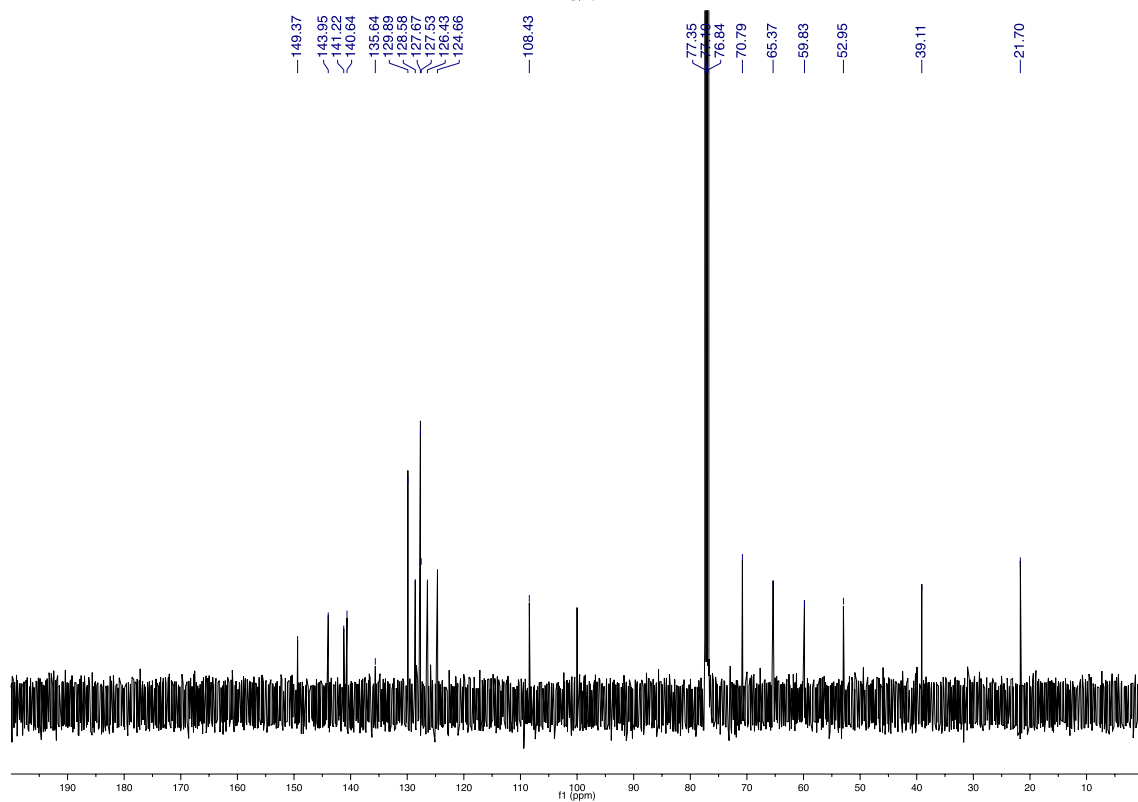

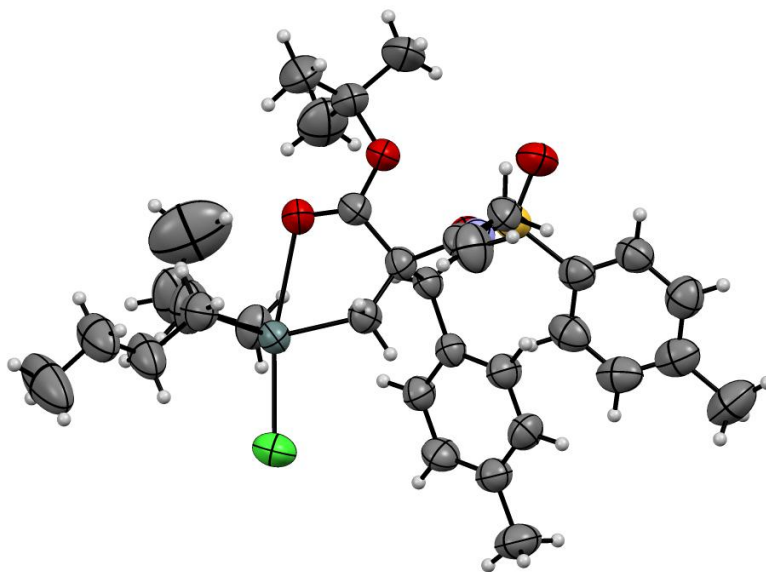ORTEP chart for **6e**
